# Supplementary material for: Size‐based ecological interactions drive food web responses to climate warming
Source: PubMed Central journal article supplement — Ecol Lett. 2019 Feb 28;22(5):778–86. doi: 10.1111/ele.13235 (PMC6849876; doi:10.1111/ele.13235), 2019-02-28
Supplement: ELE-22-778-s001.pdf [file ELE-22-778-s001.pdf]

1 **Appendix S1**  
2 **Supporting Information for**  
3 ***Size-based ecological interactions drive food web responses to climate***  
4 ***warming***  
5

6 Max Lindmark<sup>a,1</sup>, Jan Ohlberger<sup>b</sup>, Magnus Huss<sup>c</sup>, Anna Gårdmark<sup>c</sup>  
7

8 <sup>a</sup> Swedish University of Agricultural Sciences, Department of Aquatic Resources, Institute of Coastal Research,  
9 Skolgatan 6, Öregrund 742 42, Sweden

10 <sup>b</sup> School of Aquatic and Fishery Sciences (SAFS), University of Washington, Box 355020, Seattle, WA 98195-  
11 5020, USA

12 <sup>c</sup> Swedish University of Agricultural Sciences, Department of Aquatic Resources, Skolgatan 6, SE-742 42  
13 Öregrund, Sweden  
14

15 <sup>1</sup> Author to whom correspondence should be addressed. Current address:

16 Max Lindmark, Swedish University of Agricultural Sciences, Department of Aquatic Resources, Institute of  
17 Coastal Research, Skolgatan 6, Öregrund 742 42, Sweden, Tel.: +46(0)104784137, email: [max.lindmark@slu.se](mailto:max.lindmark@slu.se)

18 Contents

19 1. Functions in the empirical stage structured biomass model..... 3

20 2. Parameterization of the empirical stage-structured biomass model..... 3

21 2.1 Body sizes ..... 3

22 2.2 Mass- and temperature dependence of individual-level rates ..... 6

23 2.2.1 Metabolism ..... 6

24 2.2.2 Feeding rate..... 7

25 2.2.3 Mortality ..... 10

26 2.2.4 Temperature-size interactions ..... 10

27 2.3 Resource..... 12

28 3. Regulation of the consumer population ..... 13

29 3.1 In the presence of a predator ..... 14

30 3.2 Ratio of juvenile to adult biomass density ..... 15

31 4. Parameter sensitivity of the empirical model..... 16

32 4.1 Maximum resource density shapes coexistence..... 16

33 4.2 Equilibrium biomass densities over temperature for different ***Rmax, T19*** (***p = 1***) ..... 17

34 4.3 Community composition over temperature and ***Rmax, T19*** for the non-selective predator .... 18

35 4.4 Equilibrium biomass densities over temperature for different ***Rmax, T19*** (***p = 0.5***) ..... 19

36 4.5 Community structure shifts with temperature and the predators' feeding preference ..... 20

37 4.6 Persistence temperature for different predator feeding preferences and variation in activation

38 energy..... 21

39 4.7 Effects of warming on predator biomass densities under different scenarios of energetic

40 efficiency..... 23

41 4.8 Mean body size of the community under warming..... 25

42 5. Generic stage-structured biomass model ..... 26

43 6. Assessing the sensitivity to model functions using a generic model ..... 29

44 Cited literature ..... 30

45

46

47

48

49

50

51

52

53

54

55

56 1. Functions in the empirical stage structured biomass model

57 Table S1 Model functions. Note that dependencies are only expressed for state variables, but all functions relate to  
58 individual-level or mass-specific rates that depend both on body size and temperature.

| Function               | Expression                                                               | Description                                                                                        |
|------------------------|--------------------------------------------------------------------------|----------------------------------------------------------------------------------------------------|
| <b>Temperature</b>     |                                                                          |                                                                                                    |
| $r_Y(T)$               | $e^{\frac{E_Y(T-T_0)}{kTT_0}}$                                           | Function scaling rate/parameter $Y$ with temperature ( $Y = M, I_{max}, a, \mu, R_{max}, \delta$ ) |
| <b>Consumer</b>        |                                                                          |                                                                                                    |
| $\eta_{J,A}(R)$        | $a_{J,A}R$                                                               | Encounter rate                                                                                     |
| $I_{J,A}(R)$           | $\frac{\eta_{J,A}(R)}{1 + \frac{\eta_{J,A}(R)}{I_{max,J,A}}}$            | Ingestion rate                                                                                     |
| $v_{J,A}(R)$           | $\sigma_z I_{J,A}(R) - M_{J,A}$                                          | Net-biomass production                                                                             |
| $v_{J,A}^+(R)$         | $v_{J,A}(R)$ if $v_{J,A}(R) > 0$ ;<br>$0$ otherwise                      | Net-biomass production limited to positive values                                                  |
| $\gamma(v_J^+, \mu_J)$ | $\frac{v_J^+(R) - \mu_J(P)}{1 - z \frac{1 - \mu_J(P)}{v_J^+(R)}}$        | Juvenile maturation rate                                                                           |
| $\mu_J(P)$             | $r_\mu \varphi_1 m_J^{\varphi_2} + \frac{I_{PJ}(J, A)}{J} P$             | Total juvenile mortality                                                                           |
| $\mu_A(P)$             | $r_\mu \varphi_1 m_A^{\varphi_2} + \frac{I_{PA}(J, A)}{A} P$             | Total adult mortality                                                                              |
| <b>Predator</b>        |                                                                          |                                                                                                    |
| $\eta_{PJ}(J)$         | $p a_P J$                                                                | Encounter rate on juveniles                                                                        |
| $\eta_{PA}(A)$         | $(1 - p) a_P A$                                                          | Encounter rate on adults                                                                           |
| $I_{PJ}(J, A)$         | $\frac{\eta_{PJ}(J)}{1 + \frac{\eta_{PJ}(J) + \eta_{PA}(A)}{I_{max,P}}}$ | Ingestion rate on juveniles                                                                        |
| $I_{PA}(J, A)$         | $\frac{\eta_{PA}(A)}{1 + \frac{\eta_{PJ}(J) + \eta_{PA}(A)}{I_{max,P}}}$ | Ingestion rate on adults                                                                           |
| $v_P(J, A)$            | $\sigma_p [I_{PJ}(J, A) + I_{PA}(J, A)] - M_P$                           | Net-biomass production                                                                             |
| $\mu_P$                | $r_\mu \varphi_1 m_P^{\varphi_2}$                                        | Background mortality                                                                               |

59 2. Parameterization of the empirical stage-structured biomass model

60 2.1 Body sizes

61 The core consumer-resource model was parameterized in (Lindmark *et al.* 2018). Here we add a  
62 predator feeding on the consumer to study a tri-trophic food chain. The state variables, i.e. species, and

63 for the consumer population (here represented by the freshwater zooplanktivorous fish roach, (*Rutilus*  
64 *rutilus*, L.) also the different life stages, are characterized by their representative body sizes. The  
65 representative weight of juvenile consumers ( $m_j$ ) is derived using the equation:  $m_j =$   
66  $\frac{m_{max}-m_{min}}{\ln(m_{max})-\ln(m_{min})}$ , where  $m_{min}$  is the weight of consumers at the onset of active feeding and  $m_{max}$  is  
67 the weight at maturation, following the approach in (van Leeuwen *et al.* 2008).  $m_{min}$  was acquired by  
68 converting length at onset of active feeding (approximately 10 mm) (Byström & García-Berthou 1999),  
69 to mass using the weight-length relationship presented in (Froese *et al.* 2014) ( $\lambda_{C1} = 0.00794$   
70 (constant) and  $\lambda_{C2} = 3.15$  (exponent)). This resulted in  $m_{min} = 0.0079$  g. With a length at maturation  
71 equalling 140 mm (Stoessel 2014),  $m_{max}$  becomes 32.4 g. The representative size of juveniles,  $m_j$ ,  
72 then becomes 3.9 g. As we assume that adults use all their energy for reproduction and therefore do not  
73 grow in size,  $m_A = m_{max} = 32.4$  g. The newborn (onset of active feeding in this case, 0.0079 g) to  
74 adult body size ratio ( $z$ ), which is used in the maturation function ( $\gamma$ ) (De Roos *et al.* 2008), is given by  
75  $m_{min}/m_{max}$ . This yields a value of  $z = 0.00025$  (Table S2), which is in line with previous studies  
76 (van de Wolfshaar *et al.* 2012).

77 The predator, here based on northern pike (*Esox lucius*, L.), is not stage-structured and is therefore  
78 represented by a single body size. This is because we want to focus the analysis on the feedbacks  
79 between predator performance and predation-induced changes in prey (consumer) stage structure,  
80 which has been shown in empirical systems, e.g. (Persson *et al.* 2007), and how temperature-effects on  
81 the food chain depend on these feedbacks. We choose the value for the representative body size of the  
82 predator (642.6 g) to ensure equal attack rates of the predator on both consumer life stages (attack rate  
83 is a function of the length of both the attacker and the victim – see Fig. S1). This was done to separate  
84 the effects of predator body size (and thus varying attack rates) from the predator feeding intensity on  
85 the different consumer life stages, which we control with parameter  $p$  (Table S2). See section [2.2.2](#)  
86 below for more detailed information.

87  
88  
89  
90  
91  
92  
93  
94  
95  
96

| Parameter                    | Value                                                       |                      |                      |                         |                      | Unit                                             | Description                                                                                                                                    | Reference                                                                                                               |
|------------------------------|-------------------------------------------------------------|----------------------|----------------------|-------------------------|----------------------|--------------------------------------------------|------------------------------------------------------------------------------------------------------------------------------------------------|-------------------------------------------------------------------------------------------------------------------------|
| <b>k</b>                     | 8.617332e-05                                                |                      |                      |                         |                      | eV K <sup>-1</sup>                               | Boltzmann's constant                                                                                                                           |                                                                                                                         |
| <b>z</b>                     | 0.00025                                                     |                      |                      |                         |                      | -                                                | New born to adult body size ratio (consumer)                                                                                                   | (Byström & García-Berthou 1999; Stoessel 2014; Lindmark <i>et al.</i> 2018)                                             |
| <b>δ</b>                     | 0.1                                                         |                      |                      |                         |                      | day <sup>-1</sup>                                | Turnover rate of shared and adult resource                                                                                                     | (De Roos & Persson 2001, 2013; van de Wolfshaar <i>et al.</i> 2006) (see Box 3.4 in De Roos & Persson (2013))           |
| <b>R<sub>max</sub></b>       | varied (0-2.6;1.7 default)                                  |                      |                      |                         |                      | g m <sup>-3</sup>                                | Maximum resource biomass density                                                                                                               | See text above                                                                                                          |
| <b>p</b>                     | varied (0-1)                                                |                      |                      |                         |                      | -                                                | Predator foraging preference for juvenile consumers                                                                                            |                                                                                                                         |
| <b>σ<sub>z,p</sub></b>       | 0.3 (zooplanktivory, consumer)<br>0.4 (piscivory, predator) |                      |                      |                         |                      | -                                                | Assimilation efficiency                                                                                                                        | (van Leeuwen <i>et al.</i> 2008)                                                                                        |
| <b>E<sub>γ</sub></b>         | <i>E<sub>M</sub></i>                                        | <i>E<sub>I</sub></i> | <i>E<sub>μ</sub></i> | <i>E<sub>Rmax</sub></i> | <i>E<sub>δ</sub></i> |                                                  |                                                                                                                                                |                                                                                                                         |
|                              | 0.594                                                       | 0.594*               | 0.45                 | varied (-0.43, 0)       | 0.43                 | eV                                               | Activation energy of metabolism, functional response parameters, mortality, maximum resource density (with/without) and resource turnover rate | (Savage <i>et al.</i> 2004; Ohlberger <i>et al.</i> 2011, 2012; Lindmark <i>et al.</i> 2018)                            |
|                              | Juvenile Consumer (J)                                       | Adult Consumer (A)   |                      | Predator (P)            |                      |                                                  |                                                                                                                                                |                                                                                                                         |
| <b>m<sub>J,A,P</sub></b>     | 3.9                                                         | 32.4                 |                      | 642.6                   |                      | g                                                | Representative body size                                                                                                                       | (Lindmark <i>et al.</i> 2018)                                                                                           |
| <b>M<sub>J,A,P</sub></b>     | 0.009                                                       | 0.006                |                      | 0.004                   |                      | g g <sup>-1</sup> day <sup>-1</sup>              | Metabolic rate**                                                                                                                               | (Diana 1982; Ohlberger <i>et al.</i> 2012), see text                                                                    |
| <b>I<sub>max,J,A,P</sub></b> | 0.183                                                       | 0.112                |                      | 0.057                   |                      | g g <sup>-1</sup> day <sup>-1</sup>              | Maximum ingestion rate**                                                                                                                       | (Hölker 2000), see text                                                                                                 |
| <b>a<sub>J,A,P</sub></b>     | 25.972                                                      | 9.083                |                      | 0.018                   |                      | m <sup>3</sup> g <sup>-1</sup> day <sup>-1</sup> | Attack rate                                                                                                                                    | (Claessen <i>et al.</i> 2000; Hjelm & Persson 2001; De Roos & Persson 2013) (see Fig. 11.2 in De Roos & Persson (2013)) |
| <b>μ<sub>J,A,P</sub></b>     | 0.001                                                       | 0.0006               |                      | 0.0003                  |                      | day <sup>-1</sup>                                | Background mortality                                                                                                                           | (De Roos & Persson 2013)                                                                                                |

98 \* This parameter is also varied between 0.297 and 0.891 in Fig. S11-S12 and Table S6  
 99 \*\* Note that metabolic rate and/or maximum ingestion rate also change with temperature differently for different  
 100 sizes when  $c_{M,I} \neq 0$  (see section [2.2.4](#) and Eq. S1)

## 101 2.2 Mass- and temperature dependence of individual-level rates

102 We model the following vital rates and parameters as temperature dependent: metabolism ( $M_{J,A,P}$ ), the  
 103 functional response via the parameters maximum ingestion rate ( $I_{max,J,A,P}$ ) and attack rate ( $a_{J,A,P}$ ), as  
 104 well as background mortality ( $\mu_{J,A,P}$ ) of the consumer and the predator, and turnover rate ( $\delta$ ) and  
 105 maximum density ( $R_{max}$ ) of the basal resource. Subscripts  $J$ ,  $A$ ,  $P$  refer to juvenile consumers, adult  
 106 consumers and predators, respectively, which are characterized by their body size (Table S1-S2).

107 Temperature dependence is acquired using an Arrhenius term  $r_Y = e^{\frac{E_Y(T-T_0)}{kTT_0}}$ , where  $T$  [K] is the  
 108 temperature,  $T_0$  [K] is an arbitrary reference temperature (here 292 ° K),  $k$  [eV K<sup>-1</sup>] is Boltzmann's  
 109 constant and  $E_Y$  [eV] is the activation energy of rate or parameter  $Y$  (Gillooly *et al.* 2001) – see main  
 110 text and Table S2. Below follows a more detailed description and derivation of the size- and  
 111 temperature-dependent functions  $M_{J,A,P}$ ,  $\sigma_{J,A,P}$ ,  $I_{max,J,A,P}$  and  $\mu_{J,A,P}$ .

### 112 2.2.1 Metabolism

113 Importantly, for metabolism we also allow temperature to affect the size dependence of the metabolic  
 114 rate through parameter  $c$ , which scales the allometric exponent of metabolism ( $\rho'_2$  at the reference  
 115 temperature) linearly with temperature (in accordance with empirical studies, (Ohlberger *et al.* 2012;  
 116 Lindmark *et al.* 2018)). Only the numerical values of the temperature-dependent allometric functions  
 117 at 19 °C are presented in Table S2 for clarity – but note that when  $c \neq 0$ , the metabolism is not only  
 118 scaled by the  $r_M$ -function but also with a temperature-effect on the size dependence (allometric  
 119 exponent). The temperature- and size-dependent metabolism is modelled as

$$M_{J,A,P} = r_M \rho_1 m_{J,A,P} \rho_2'^{c(T-T_0)} \quad (S1)$$

120 where  $\rho_1$  is the allometric constant (see below),  $\rho_2'$  is the allometric exponent at 19 °C and  $c$  is a linear  
 121 temperature dependence of the allometric exponent (see section [2.2.4](#)) We varied the  $c$ -parameter in the  
 122 main analysis to study the effect of temperature-independent size-scaling of metabolism ( $c = 0$ ) as well  
 123 as the case when warming increases metabolic rate more for large individuals than small ones (i.e.,  $c >$   
 124 0, here  $c = 0.005$ ). For the consumer population, the parameters  $\rho_1$ ,  $\rho_2'$  and  $E_M$  are derived from  
 125 experiments on roach (van de Wolfshaar *et al.* 2006; Ohlberger *et al.* 2012).  $E_M$  is 0.594 [eV], similar  
 126 to values found in other studies (Downs *et al.* 2008), and  $\rho_2' = 0.77$  (van de Wolfshaar *et al.* 2006). We  
 127 rescaled the allometric constant ( $\rho_1$ ) to unit g wet weight, assuming an energy density of 6000 J g<sup>-1</sup>, in  
 128 line with previous studies (Pothoven *et al.* 2006; Lumb *et al.* 2007; van Leeuwen *et al.* 2008; van de

129 Wolfshaar *et al.* 2012) and to a new reference temperature (19 °C, instead of 0 °C). This resulted in a  
130 value for  $\rho_1$  of  $0.0123 \text{ g}^{(1-\rho'_2)} \text{ day}^{-1}$  (Lindmark *et al.* 2018).

131 In this study, we assumed equal temperature dependence (activation energy) for the predator species  
132 as for our consumer species (i.e. the same  $r_M$ ), but derived species-specific allometric parameters for  
133 the predator's metabolic rate based on experiments on pike (Armstrong *et al.* 1992). In (Armstrong *et al.*  
134 *al.* 1992), the allometric function describing resting metabolic rate (oxygen consumption) at 15 °C was  
135 estimated to be  $V_{O_2} = 0.162m_P^{0.8} \text{ [mg O}_2 \text{ h}^{-1}]$ . Using the relationship  $1 \text{ kcal kg}^{-1} \text{ h}^{-1} =$   
136  $308 \text{ mg O}_2 \text{ kg}^{-1} \text{ h}^{-1}$  (Groot 2010), we rescaled the metabolic rate for a representative predator  
137 weighing 642.6 g to unit  $\text{g g}^{-1} \text{ day}^{-1}$ . Assuming  $1 \text{ cal} = 4.1855 \text{ J}$  at that temperature, metabolic energy  
138 demand is  $2226 \text{ cal day}^{-1}$ , or  $9316 \text{ J day}^{-1}$ . With an energy density of  $3600 \text{ J g}^{-1}$  for pike (Heikinheimo  
139 & Korhonen 1996), the mass-specific metabolic rate becomes  $0.004 \text{ g g}^{-1} \text{ day}^{-1}$  at 15 °C. The parameter  
140  $\rho_1$  in the equation for metabolism (Eq. S1) then becomes  $0.0147 \text{ g}^{(1-\rho'_2)} \text{ day}^{-1}$  for pike at 15 °C, using  
141 the same conversions. This can be rescaled to our reference temperature (19 °C) by dividing it with  
142  $0.7207 (M_{P,15^\circ \text{C}}/M_{P,19^\circ \text{C}})$ , given the constant  $\rho_1$  at 15 °C), yielding a  $\rho_1$  of  $0.02 \text{ [g}^{(1-\rho'_2)} \text{ day}^{-1}]$  at 19  
143 °C. Lastly, Diana (1982) shows that the allometric exponent ( $\rho'_2$ ) for pike is strongly dependent on  
144 temperature, but only two temperatures are given in that study. We therefore approximated a value at  
145 19 °C by assuming a linear temperature effect on the exponents ( $\rho'_{2,2^\circ \text{C}} = 0.97$  and  $\rho'_{2,14^\circ \text{C}} = 0.82$ ),  
146 resulting in  $\rho'_{2,19^\circ \text{C}} = 0.76$ . With these parameters, the mass-specific metabolic rate at 19 °C is  $0.0043$   
147  $\text{g g}^{-1} \text{ day}^{-1}$  for the predator, using Eq. S1. The resulting mass-specific metabolic rates are close to  
148 previous studies using similar models with other piscivorous fish (van Leeuwen *et al.* 2008; van  
149 Denderen & van Kooten 2013). However, it should be noted that the variation in metabolic rate for pike  
150 is very large in the literature – even when accounting for the effects of size and temperature (Armstrong  
151 & Hawkins 2008). Because metabolism is the major loss term in the biomass dynamics of the predator,  
152 the exact value in relation to their ingested energy will shape their biomass densities at equilibrium for  
153 a given  $R_{max,T19}$ , and therefore their ability to persist in warmer environments (see section 2.2.3 below  
154 for parameterization of the resource). Thus, when making quantitative predictions, accurate descriptions  
155 of both the bio-energetics and habitat  $R_{max,T19}$  are key parameters, as well as the feeding preference of  
156 the predator. In this study, we focus on exploring the range of qualitative dynamics to identify the  
157 mechanisms driving potential changes in community dynamics and structure.

### 158 2.2.2 Feeding rate

159 Ingested energy,  $I_{J,A}(R)$ ,  $I_{PJ}(J,A)$  and  $I_{PA}(J,A)$  for consumer life stages and the predator species,  
160 respectively, follows a Holling type II functional response (Holling 1959) (Table S1), with size- and  
161 temperature-dependent functions describing maximum ingestion ( $I_{max,J,A,P}$ ) and attack rate ( $a_{J,A,P}$ ).  
162  $I_{max,J,A,P}$  is an allometric function given by  $r_I \varepsilon_1 m_i^{\varepsilon_2 + c_I(T-T_0)}$ . We estimated parameters  $\varepsilon_1$ ,  $\varepsilon_2$ ,  $c_I$  and

163 the activation energy,  $E_I$  within the temperature scaling function  $r_I = e^{\frac{E_I(T-T_0)}{kTT_0}}$ , from data on estimated  
 164 allometric functions at different temperatures, provided in (Hölker 2000) (Table S3).  
 165

166 *Table S3. Results from the nls model used to estimate parameters in allometric functions for  $I_{max,J,A}$*

| Parameter    | Estimate | Standard error | t-value | Unit                                       |
|--------------|----------|----------------|---------|--------------------------------------------|
| $\epsilon_1$ | 0.248    | 0.004          | 61.97   | $\text{g}^{(1-\epsilon_2)}\text{day}^{-1}$ |
| $\epsilon_2$ | 0.767    | 0.003          | 234.28  | -                                          |
| $E_I$        | 1.206    | 0.032          | 37.27   | eV                                         |
| $c_I$        | -0.011   | 0.001          | -12.32  | $^{\circ}\text{C}^{-1}$                    |

167  
 168 These data stem from ad-libitum feeding experiments of roach weighing 1.2-300 g performed at  
 169 temperatures between 5 °C and 20 °C (presented in unit  $\text{g day}^{-1}$ ). Non-linear least-squares regression  
 170 (*nls* function in R version 3.4.2 (R Core Team 2018), using the Gauss-Newton algorithm) was used to  
 171 estimate the parameters. We assumed identical scaling of  $I_{max,J,A,P}$  for both predators and consumers.  
 172 This is commonly done in physiologically structured population models (Claessen *et al.* 2000), and  
 173 there is no clear biological reason for why the size dependence of handling time (or maximum intake  
 174 rate as in our case) should differ significantly between prey types when the mode of feeding (active) is  
 175 the same. The allometric constant may, however, be species-specific, but as we are not aiming to make  
 176 quantitative predictions for a given species we believe this is an accurate approximation from a detailed  
 177 and rare set of experiments with a fully-factorial design, a large size range, and multiple temperature  
 178 replicates (Hölker 2000; Hölker & Haertel 2004). Note also that while intraspecific temperature  
 179 dependence of  $I_{max,J,A,P}$  (or handling time) shows remarkable variation (Dell *et al.* 2011a; Englund *et*  
 180 *al.* 2011a), our estimate ( $E_I = 1.206$  eV) is at the higher end of the range (0-1.2 eV) given in (Dell *et*  
 181 *al.* 2011a). Therefore, in the default parameterization of the empirical model, we applied a value  
 182 identical to the activation energy for metabolism ( $E_I = E_M = 0.594$  eV), while keeping the other  
 183 parameters as in Table S2. However, we also varied the temperature dependence of functional response  
 184 parameters by scaling them relative to  $E_M$  using a factor of 0.5-1.5 (Table S2). These results are  
 185 presented in sections [4.4.6](#) and [4.4.7](#). In section [4.4.7](#) we performed a similar analysis but also controlling for  
 186 the temperature dependence of mortality.

187 We derive attack rates ( $a_{J,A,P}$ ) for each consumer life stage and the predator. Note that even though  
 188 the predator attack rates depend on the size of the consumer as well as the predator (Persson *et al.* 1998;  
 189 Claessen *et al.* 2000; Hjelm & Persson 2001), in our model we choose a predator size that yields  
 190 identical attack rates given the attack rate function and parameters used (see below) (Fig. S1), to  
 191 separate the effects of size-dependent attack rate from predator feeding preferences ( $p$ , see above).



192 Consumer attack rate on zooplankton is modelled as  $a_{J,A} = r_I \hat{A} \left[ \frac{m_{J,A}}{o_z} \exp \left( 1 - \frac{m_{J,A}}{o_z} \right) \right]^\alpha$ , where  $\hat{A}$  is the  
 193 maximum attack rate (300 m<sup>3</sup> day<sup>-1</sup>),  $o_z$  is the optimal forager size (41 g) and  $\alpha$  is the size-scaling  
 194 exponent (0.75). These attack rate parameters were estimated for roach from experiments with 1 mm  
 195 *Daphnia* as prey (Hjelm & Persson 2001).

196 For the predator's attack rate on the consumer life stages, we follow the approach in Claessen et al  
 197 (Claessen *et al.* 2000). This is a length-based approach in which the predation window ( $W$ ) is the range  
 198 of predator to prey (henceforth consumer) body length ratios that yield a positive attack rate. We used  
 199 the weight-length relationships presented in (Froese *et al.* 2014) ( $\lambda_{P1} = 0.00447$  (constant) and  $\lambda_{P2} =$   
 200 3.08 (exponent)) to convert length to mass for pike. The predation window,  $W(l_P, l_{J,A})$ , as a function  
 201 of predator ( $l_P$ ) and consumer ( $l_{J,A}$ ) length (given by  $\lambda_{C1}$  and  $\lambda_{C2}$  – see section 2.1, is given by the  
 202 following equation:

$$203 \quad W(l_P, l_{J,A}) = \begin{cases} \frac{l_{J,A} - \vartheta_{min} l_P}{(\vartheta_{opt} - \vartheta_{min}) l_P} & \text{if } \vartheta_{min} l_P < l_{J,A} \leq \vartheta_{opt} l_P \\ \frac{\vartheta_{max} l_P - l_{J,A}}{(\vartheta_{max} - \vartheta_{opt}) l_P} & \text{if } \vartheta_{opt} l_P < l_{J,A} < \vartheta_{max} l_P, \\ 0 & \text{otherwise} \end{cases}$$

204 where  $\vartheta_{min}$  is the minimum predator-consumer length ratio,  $\vartheta_{opt}$  is the optimum length ratio and  $\vartheta_{max}$   
 205 is the maximum predator-consumer length ratio for which predation is possible. We use the parameter  
 206 values  $\vartheta_{min} = 0.03$  and  $\vartheta_{max} = 0.55$  for pike (Persson *et al.* 2006). As we could not find an estimate  
 207 for  $\vartheta_{opt}$  for pike, we adopted the default value of 0.2, based on the piscivorous predator perch (*Perca*  
 208 *fluviatilis*, L.) presented in Claessen et al (Claessen *et al.* 2000). The relative attack rate that the  
 209 predation window represents is multiplied with an allometric function of the form  $\beta_1 l_P^{\beta_2} W(l_P, l_{J,A})$  to  
 210 get absolute values in m<sup>3</sup> day<sup>-1</sup>. We use the values  $\beta_1 = 0.4$  and  $\beta_2 = 0.6$  (Claessen *et al.* 2000; De  
 211 Roos & Persson 2013) (see Fig. 11.2 in (De Roos & Persson 2013)). The representative body size of  
 212 the predator was set to acquire the same attack rate by the predator on both consumer life stages, i.e.  
 213 based on where the two attack-rate windows intersect for the two consumer life stages (Fig. S1), to  
 214 disentangle the effect of predator feeding preference which we scale with parameter  $p$ , from those of  
 215 its size-dependent attack rate.

216 The net energy gain is scaled by an assimilation efficiency,  $\sigma_{p,z}$ . We followed the approach in (van  
 217 Leeuwen *et al.* 2008) and used the values 0.4 and 0.3 for piscivory ( $\sigma_p$ ) and zooplanktivory ( $\sigma_z$ ),  
 218 respectively, and assumed assimilation efficiency to be temperature-independent (Peters 1983; Gilbert  
 219 *et al.* 2014).

220  
 221  
 222  
 223

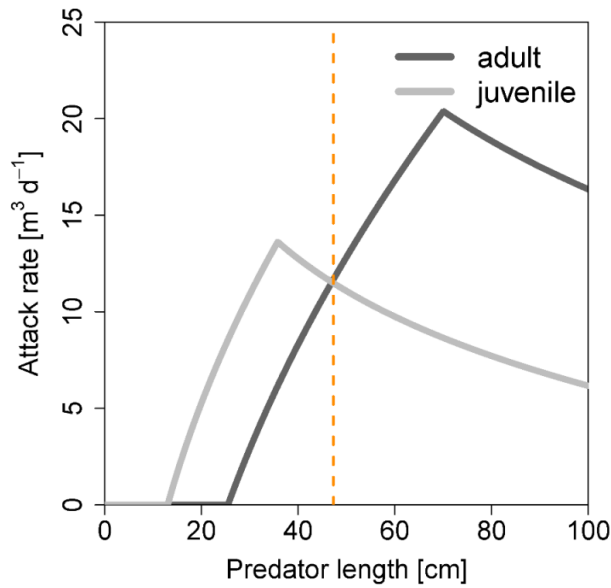

224

225 **Fig. S1.** Predator attack rate as a function of predator body length shown for adult (black) and juvenile  
 226 (grey) consumers. Orange dashed line shows the predator length that gives equal attack rates on both  
 227 consumer life stages, which is used to set the representative body size of the predator (47 cm, 642.6 g).  
 228 [See section 2.2](#) for equations.

229

### 230 2.2.3 Mortality

231 As in (Lindmark *et al.* 2018), we assumed a temperature-dependent allometric function for whole-  
 232 organism background mortality of the form  $r_{\mu}\varphi_1 m_{J,A,P}^{\varphi_2}$ , where  $\varphi_1 = 0.0015$  (De Roos & Persson  
 233 2013) (see Box 3.4 in (De Roos & Persson 2013)) and  $\varphi_2 = -0.25$  (Gillooly *et al.* 2001) and  $E_{\mu}$  within  
 234  $r_{\mu}$  is set to 0.45 eV (Savage *et al.* 2004).

### 235 2.2.4 Temperature-size interactions

236 Note that while the temperature-size interaction term for maximum ingestion ( $c_I$ ) is significantly  
 237 different from 0 in the statistical model (Table S3), we only model temperature-effects on the metabolic  
 238 exponents in the dynamical models for clarity and refer to that parameter as  $c$  (see also (Lindmark *et*  
 239 *al.* 2018); Equation S1). It does not matter qualitatively which exponents are varied (positive effect on  
 240 metabolism exponent or negative effect on maximum ingestion exponent), as both lead to steeper size-  
 241 scaling of the critical resource density needed to meet basal metabolic demands ( $R_{crit}$ ) in warmer  
 242 environments (see main text).  $R_{crit}$  is given by  $R_{crit} = \frac{M}{a(\sigma - \frac{M}{I_{max}})}$ , where  $M$  is metabolic rate,  $\sigma$  is the  
 243 assimilation efficiency,  $a$  is attack rate and  $I_{max}$  is maximum ingestion rate (Byström & Andersson  
 244 2005). For example, all else being equal,  $c = 0.02$  leads to an 85.6% increase in  $R_{crit}$  for a 32.4 g  
 245 individual (representative size for adult an consumer) at 26 °C relative to 19 °C (not shown), while  $c_I =$   
 246  $-0.01$  (i.e. interactive effect of size and temperature for maximum ingestion rate, as found in our

247 species) leads to a 5.7% increase over the same temperature range and for the same body size. Previous  
 248 studies have found  $c$  to vary roughly between -0.02 and 0.02 (Ohlberger *et al.* 2012; Lindmark *et al.*  
 249 2018) for metabolic rate. If assuming a temperature-independent exponent of feeding rates (i.e.  $c_I = 0$ ),  
 250  $c = 0.02$  would lead to potentially large effects of temperature on the size-scaling of CRD. In this study  
 251 we used a value of  $c = 0.005$  (Fig. S2), which is lower than the upper range of  $c$ -values found in  
 252 previous studies on intraspecific temperature effects (e.g.  $c = 0.02$ ) (Ohlberger *et al.* 2012; Lindmark  
 253 *et al.* 2018) (see also (Lindmark *et al.* 2018) for an assessment of the effect of  $c$  for a larger range of  
 254 values, including negative values). With  $c = 0.005$ ,  $R_{crit}$  increases by 15.9% for a 32.4 g individual.  
 255 This is larger than the empirical estimate of our model species (see above). However, since it is  
 256 substantially lower relative to potential effects of  $c$  on  $R_{crit}$  (when considering the empirical range  
 257 found in a number of species (Ohlberger *et al.* 2012; Lindmark *et al.* 2018)), we view  $c = 0.005$  as a  
 258 small to moderate temperature-size interaction effect in terms of the effects on the size-scaling of  $R_{crit}$   
 259 at different temperatures.  
 260

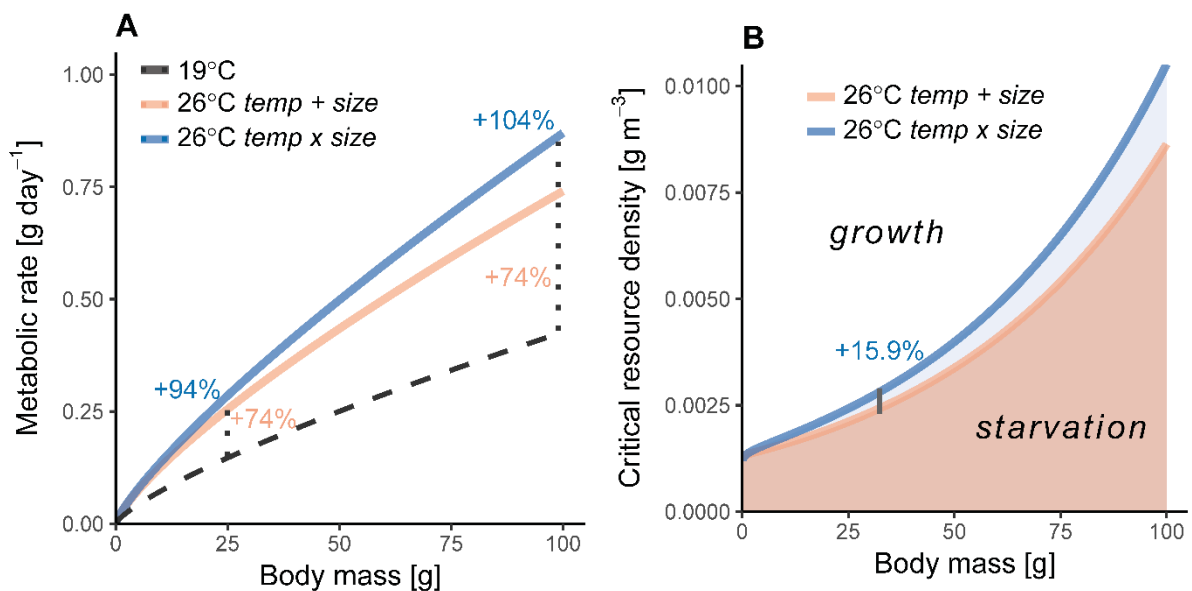

261  
 262 **Fig. S2.** Temperature- and size dependence of metabolic rate and the critical resource density ( $R_{crit}$ )  
 263 needed to meet metabolic demands. Metabolic rate (A) and critical resource density (B) as functions of  
 264 body mass for the consumer at 26 °C given positive interactive ( $c = 0.005$ ) (blue) and independent  
 265 ( $c = 0$ ) (coral) effects of temperature and body size on metabolic rate. Black vertical dotted lines in  
 266 panel (A) show 25 g and 99 g individuals for illustration purposes, for which metabolic rate is 94% and  
 267 104% higher at 26 °C relative to 19 °C when metabolism scales with a positive temperature-size  
 268 interaction. In the case of independent temperature-size scaling, metabolism increases with 74% relative  
 269 to 19 °C regardless of body mass. In (B) the effect of  $c$  is illustrated for a body size that represents the  
 270 adult life stage in our study species (vertical line), for which the critical resource density increases by  
 271 16% when  $c = 0.005$  compared to when  $c = 0$ .

272 2.3 Resource

273 We used the activation energy of resource turnover rate ( $E_\delta = 0.43$ ) as in (Lindmark *et al.* 2018) which  
 274 was acquired by fitting a non-linear least-squares regression to the increasing part of the hump-shaped  
 275 temperature dependence used in (Ohlberger *et al.* 2011) (s.e. = 0.01098,  $t = 39.42$ ,  $p < 0.0001$ ). This  
 276 hump-shaped curve stems from a bioenergetics model (Karås & Thoresson 1992), where parameters  
 277 for optimum- and maximum growth temperatures are derived from within-species population growth  
 278 data (Mitchell *et al.* 2004) (Fig. S3).

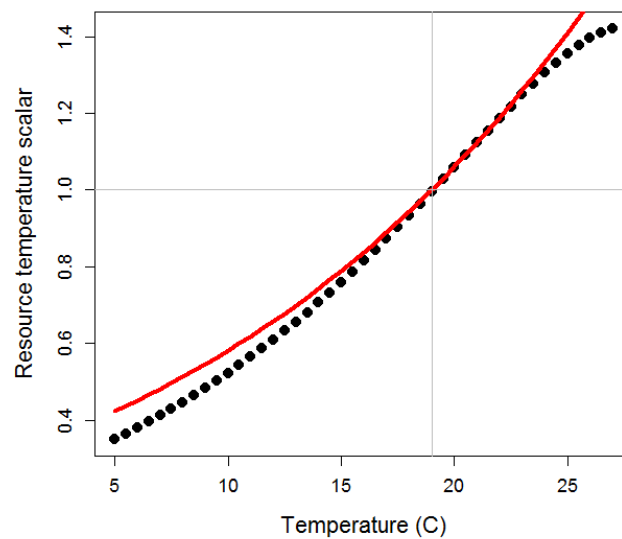

279 **Fig. S3.** Simulated resource temperature scalar from Ohlberger *et al.*, (2011) based on the bioenergetics  
 280 model in Karås & Thoresson (1992) and data from Mitchell *et al.*, (2004) (black points). The red line  
 281 is the fit of the nls model to these simulated data, yielding an activation energy of  $E_\delta = 0.43$ . This is  
 282 the default value used in the main analysis (which also applies to  $E_{R_{max}}$ , see main text), but it also  
 283 varied in Table S5-S6.

284  
 285 To capture a broad range of realistic temperature dependencies of resource growth, we varied the  
 286 temperature dependence of  $R_{max,T19}$  (19 °C) with parameter  $E_{R_{max}}$  (Fig. 2). We did this by assuming  
 287 two contrasting scenarios; no effect of temperature on  $R_{max,T19}$  ( $E_{R_{max}} = 0$ ) or  $R_{max,T19}$  declining with  
 288 the same rate as turnover rate increases (i.e.  $E_{R_{max}} = -E_\delta = -0.43$  [eV]), based on mass conservation  
 289 and metabolic scaling principles (Gilbert *et al.* 2014) – see also methods section in the main text. The  
 290 resource turnover rate at reference temperature (19 °C) was assumed to be 0.1 (De Roos & Persson  
 291 2001, 2013; van de Wolfshaar *et al.* 2006).  $R_{max,T19}$  was varied between 0 and 2.6 [g m<sup>-3</sup>] in the  
 292 analysis. This range was chosen to ensure both persistence of predators and non-cyclic dynamics in  
 293 most of the parameter space. Note that with increasing  $R_{max,T19}$ , the parameter regions with cyclic  
 294 dynamics increase (Fig. S8).  
 295

### 296 3. Regulation of the consumer population

297 In stage-structured biomass models with two life stages (adults and juveniles), competitive asymmetry  
298 between juveniles and adults (“*ontogenetic asymmetry*”) refers to juveniles or adults being more limited  
299 by resources than the other. This implies that the life stage with the least efficient biomass production  
300 becomes an energetic bottleneck. Several studies have pointed out that the most important consequence  
301 of ontogenetic asymmetry is an overcompensatory response in biomass to mortality (De Roos *et al.*  
302 2007; Persson & De Roos 2013). This is due to mortality relaxing resource competition, to which the  
303 most resource-limited stage responds with increased net biomass production, which can manifest itself  
304 in higher rates of per capita and population-level reproduction or maturation, depending on which stage  
305 is more resource limited. Ultimately, this leads to a hump-shaped relationship between biomass density  
306 at equilibrium and mortality (usually of one life stage).

307 As our main results of alternative stable states emerging in warmer environments, are due to the  
308 presence or absence of biomass overcompensation (induced by predation in this case), we here explain  
309 how the consumer population is regulated in terms of which life stage is the more efficient biomass  
310 producer and its consequences for the effect of mortality (Table S4). In the absence of predators, the  
311 consumer population is limited by slow reproduction and the adult life stage is an energetic bottleneck  
312 in terms of biomass production (Persson & De Roos 2013). This can be predicted by the lower critical  
313 resource density ( $R_{crit}$ ) of juveniles (see Fig. S2B) when both life stages compete for a shared resource.  
314 Inspection of the rates of maturation and reproduction at equilibrium when the predator is extinct  
315 verifies that reproduction is lower than maturation at high temperatures (Fig. S4B and see also Table  
316 S4 for results at reference temperature without predators). This asymmetry in net biomass production  
317 (adult energetic bottleneck) in the consumer population is what causes the overcompensatory response  
318 to increased mortality when predators predominantly target juveniles (De Roos *et al.* 2007). To  
319 generalize our results on stability and persistence over temperature and link them to the stage-structure  
320 in the consumer population, we also redo the main analysis with the original (generic) parameterization  
321 (De Roos *et al.* 2007; De Roos & Persson 2013) of the model while also varying the regulation of the  
322 consumer population with the phenomenological parameter  $q$ , see section 5.

323

324 *Table S4 Characteristics of the stage-structured consumer population in absence of predation mortality at reference*  
325 *temperature using the empirical model with default parameterization.*

| <b>Characteristic</b>                                             | <b>Result in empirical model (default parameters)<br/>without predators</b>                  |
|-------------------------------------------------------------------|----------------------------------------------------------------------------------------------|
| <b>Which life stage has the lowest critical resource density?</b> | Juveniles, which indicate they are superior competitors for a shared resource (see Fig. S2B) |

|                                                                                      |                                                                                                                                                                                                                     |
|--------------------------------------------------------------------------------------|---------------------------------------------------------------------------------------------------------------------------------------------------------------------------------------------------------------------|
| <b>Which life stage is more dominant in terms of biomass density at equilibrium?</b> | Adults (Adults=6.58 [g m <sup>-3</sup> ], Juveniles=1.04 [g m <sup>-3</sup> ])                                                                                                                                      |
| <b>Which rate is largest at equilibrium (maturation vs reproduction)?</b>            | Maturation, causing a pile-up of biomass in the adult life stage (maturation = 0.004 [g m <sup>-3</sup> day <sup>-1</sup> ] reproduction = 1.51e-05 [g m <sup>-3</sup> day <sup>-1</sup> ])                         |
| <b>Is there overcompensatory response to mortality?</b>                              | In Juveniles, as lower consumer biomass (from mortality) reduces competition which increases per capita and population level reproduction of adults, causing an increase in juvenile biomass density at equilibrium |

326

### 327 3.1 In the presence of a predator

328 In the presence of a juvenile specialized predator (Fig. S4B), predation releases the adult consumer life  
329 stage from strong intraspecific competition, resulting in a larger reproductive output than when  
330 predators do not shape the stage structure of the consumer (Fig. S4A, or when predators are extinct in  
331 Fig. S4B high temperatures; Table S4 for reference temperature without predators). In the latter  
332 scenarios, a slow reproduction is the bottleneck of the consumer population. Therefore, a juvenile-  
333 specialized predator promotes its own food source by inducing a high reproductive output in its prey  
334 species. The general decline in predator biomass density with warming impacts the stage structure of  
335 the consumer population (Fig. S5), and this is more drastic in the case of a predator feeding  
336 predominantly on juveniles (Fig. S5B). Eventually the regulation of the consumer population also  
337 changes (when predators collapse). This is evident in that with predators present (low temperatures in  
338 Fig. S4B), consumer maturation rate is lower than the reproductive output, whereas when predators are  
339 extinct (high temperatures in Fig. S4B) a slow reproduction instead limits consumer population growth.  
340 When predators feed on both life stages they do not change the stage structure of the consumer to an  
341 extent that alters their regulation. This is the mechanism behind biomass overcompensation, which  
342 occurs when mortality releases the consumer life stage that limits population growth from high density  
343 dependence.

344

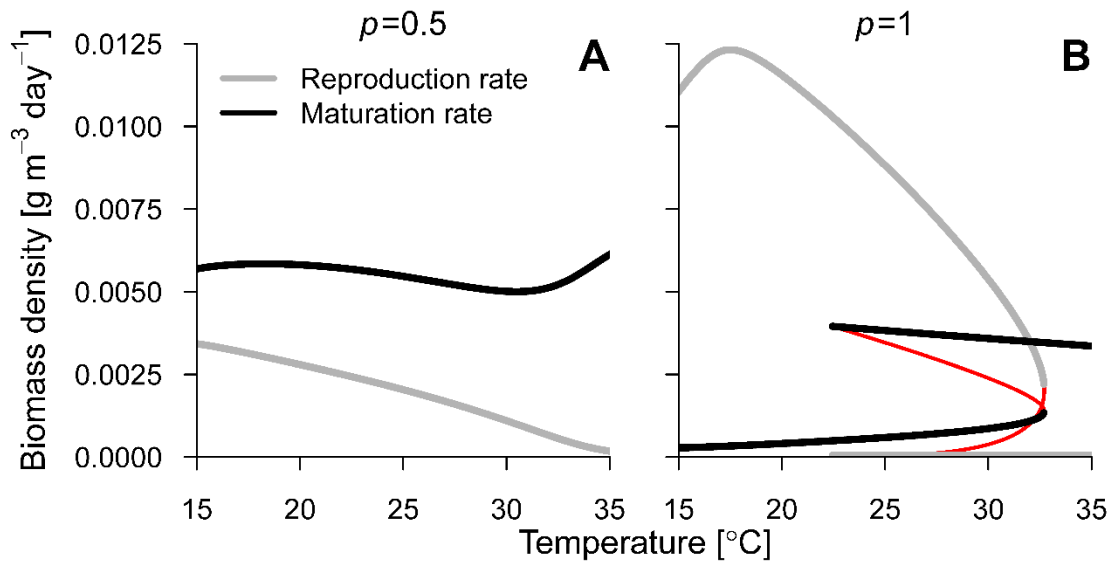

345

346 **Fig. S4.** Population-level maturation ( $\gamma[v_j^+(R, P)]/J$ ) (black) and reproduction ( $v_A^+(R)A$ ) (grey) rate in  
 347 the consumer population (see Table S1) at equilibrium as a function of temperature, for a predator  
 348 feeding with equal intensity on both life stages (A) ( $p = 0.5$ ) and a predator feeding exclusively on  
 349 juveniles (B) ( $p = 1$ ). When reproduction and maturation rates differ (in terms of biomass density per  
 350 unit time), the growth of the consumer population is limited by the lower of the two rates. In this figure,  
 351 the consumer life stage is limited by low reproductive output from adults, unless juvenile-specialized  
 352 predators are present (B) at sufficiently high densities to induce a shift in the stage structure of the  
 353 consumer such that it becomes dominated by juveniles, leading to a slow maturation rate relative to the  
 354 reproductive output of adults.  $E_{R_{max}} = -0.43$ , all other parameters have default values.

### 355 3.2 Ratio of juvenile to adult biomass density

356 Fig. S5 illustrates the juvenile to adult biomass ratio at equilibrium in the empirical model. It shows that  
 357 in the stable equilibrium with coexistence, the juvenile to adult biomass ratio decreases with  
 358 temperature, and does so more rapidly with positive temperature-size interactions ( $c = 0.005$ ). This is  
 359 likely because temperature-size interactions induce a proportionally stronger negative effect on the  
 360 energetic efficiency of adults, which reduces the reproductive output and thus juvenile biomass (but  
 361 note the predator biomass density, which shapes the consumer stage structure through predation, is also  
 362 affected by  $c = 0.005$ ). Thus, persistence of a juvenile-specialized predator ( $p = 1$ ; Fig. S5B) is  
 363 reduced when  $c = 0.005$  relative to  $c = 0$ .

364

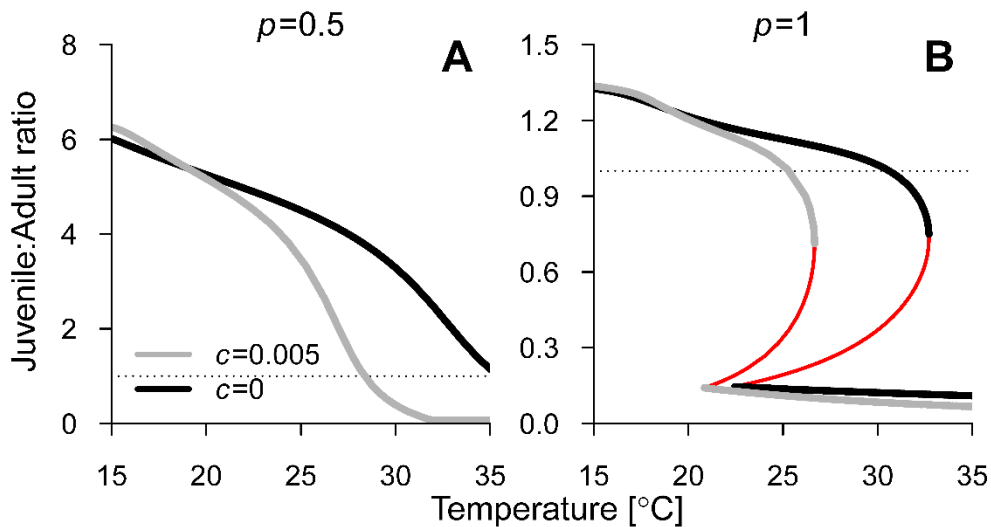

365  
366

367 **Fig. S5.** Ratio of juvenile to adult biomass at equilibrium as a function of temperature for a predator  
368 feeding with equal intensity on both consumer life stages (A) ( $p = 0.5$ ) and a predator feeding  
369 exclusively on juveniles (B) ( $p = 1$ ), for two temperature-size scaling scenarios for the consumer and  
370 predator.  $c = 0$  (black lines) refers to independent effects of size and temperature and  $c = 0.005$  (grey  
371 lines) means interactive effects of temperature on the size-scaling exponent of metabolism. Horizontal  
372 dotted lines show 1:1 juvenile to adult biomass ratios. When predators feed exclusively on juveniles  
373 (panel B), bistability emerges (then unstable equilibria which connect the two stable equilibria are  
374 shown with thin red lines for completeness). The interactive temperature-size scaling for metabolism  
375 shifts the stage structure in the consumer population, by reducing the energetic performance of adults,  
376 leading to reduced reproductive output (see Fig. S4 and corresponding figure text for reproduction vs  
377 maturation rate and how these rates regulates the consumer population). Note the different scales on the  
378 y-axes and that in B, the consumer stage structure is no longer shaped by predation as predators are  
379 extinct.  $E_{R_{max}} = -0.43$  and all other parameters have default values.

#### 380 4. Parameter sensitivity of the empirical model

381 In this section, additional analyses to supplement the main analysis are presented. The results are  
382 described and explained in the corresponding sections and figure legends.

##### 383 4.1 Maximum resource density shapes coexistence

384 As maximum resource density,  $R_{max,T19}$ , largely determines the community structure and composition  
385 for a given temperature, we first performed continuation analysis of equilibria over  $R_{max}$  at 19 °C  
386 (reference temperature, where all temperature scaling functions,  $r_Y$ , equal 1) (Fig. S6). This was done  
387 in order to find a default  $R_{max,T19}$  (Table S2) that ensures coexistence without a dominance of cyclic



388 equilibrium dynamics, given default parameters (e.g. Fig. S8). Note, however, that we also vary the  
 389 parameter  $R_{max,T19}$  in the main analyses (Fig. 2, main text). From low to high  $R_{max,T19}$ -values,  
 390 consumers can first invade a stable resource-only system. Then, depending on the type of feeding  
 391 preference in the predator, predators can either persist (limit point, saddle node bifurcation) ( $p = 1$ ) or  
 392 invade (branching point, transcritical bifurcation) ( $p = 0.5$ ). In the case of  $p = 1$ , invasion occurs at  
 393 higher temperatures than temperatures allowing for persistence, which gives rise to bistability where  
 394 predators are either absent or present. Above this  $R_{max,T19}$ -value ( $\sim 1.3$ ), all species can coexist. From  
 395 this point, if predators feed equally on both life stages ( $p = 0.5$ ), higher  $R_{max,T19}$  results in cyclic  
 396 dynamics (Hopf bifurcation)

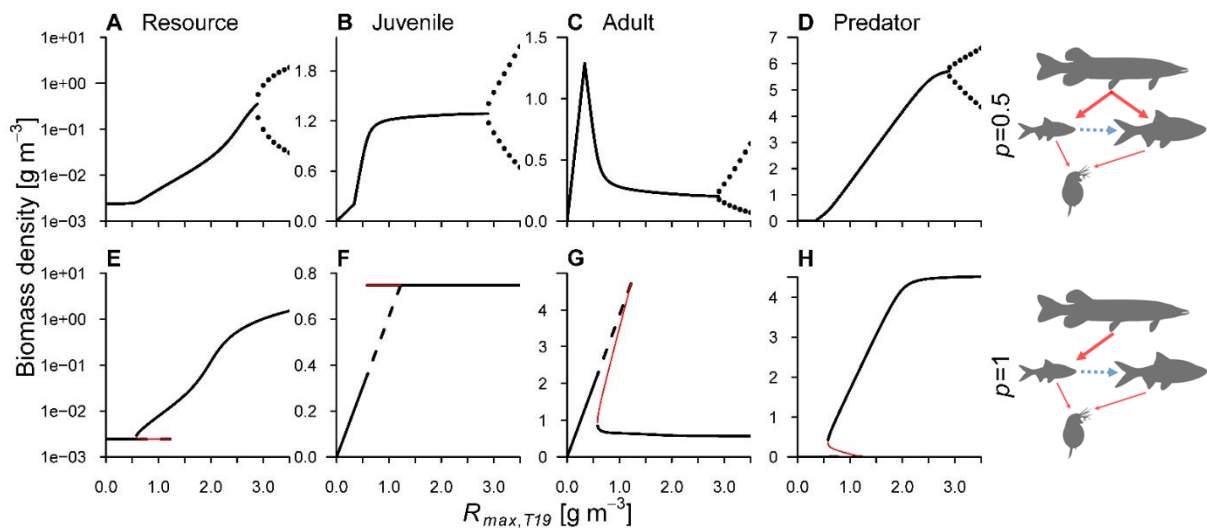

397  
 398 **Fig. S6.** Effects of  $R_{max,T19}$  on food chain stability depend on ecological interactions. Equilibrium  
 399 biomass densities of the resource (A, E), consumer life stages (B-C, F-G) and predator (D, H) as a  
 400 function of  $R_{max,T19}$ , given a predator feeding with equal intensity on both life stages (A-D) ( $p = 0.5$ )  
 401 or exclusively on juveniles (E-H) ( $p = 1$ ). Black lines (full and dashed) are stable equilibria and red  
 402 thin lines are unstable equilibria (connecting the two stable branches in the bistable region, shown for  
 403 completeness), which separate the two stable equilibria when there are alternative stable states.  
 404 Maximum and minimum biomass of a stable limit cycle is shown with points (top row,  $R_{max,T19} >$   
 405  $2.9$ ). Alternative stable states, where predators are either extinct or abundant, occur between  $R_{max,T19}$   
 406  $\sim (0.6-1.2)$  in E-H. Note the different scales on the y-axes and the logarithmic y-axis for resources  
 407 densities. Temperature is  $19\text{ }^{\circ}\text{C}$  and all parameters have default values.

#### 408 4.2 Equilibrium biomass densities over temperature for different $R_{max,T19}$ ( $p = 1$ )

409 Fig. S7 illustrates the change in equilibrium biomass densities over temperature for three selected  
 410  $R_{max,T19}$ -values, representing high, medium and low  $R_{max,T19}$ -values (covered in Fig. 2, main text),  
 411 and no (upper panel) and negative (lower panel) effects of temperature on  $R_{max,T19}$ . Its main purpose  
 412 is to complement Fig. 2 (main text) and to show actual biomass densities in addition to the bifurcation

413 points shown in Fig. 2. This shows at which biomass densities predators collapse because they are not  
 414 able to control the stage-structure of their prey (Fig. S7H). It also shows that more productive (higher  
 415  $R_{max,T19}$ ) systems lead to higher biomass densities of predators, which allows them to persist at higher  
 416 temperatures. This is because biomass is transferred up in the food chain from the basal resource and is  
 417 built up in the predator population (De Roos & Persson 2013), which also explains why the consumer  
 418 biomass density at equilibrium does not change with  $R_{max,T19}$  when predators are present (Fig. S7B-C,  
 419 F-G).

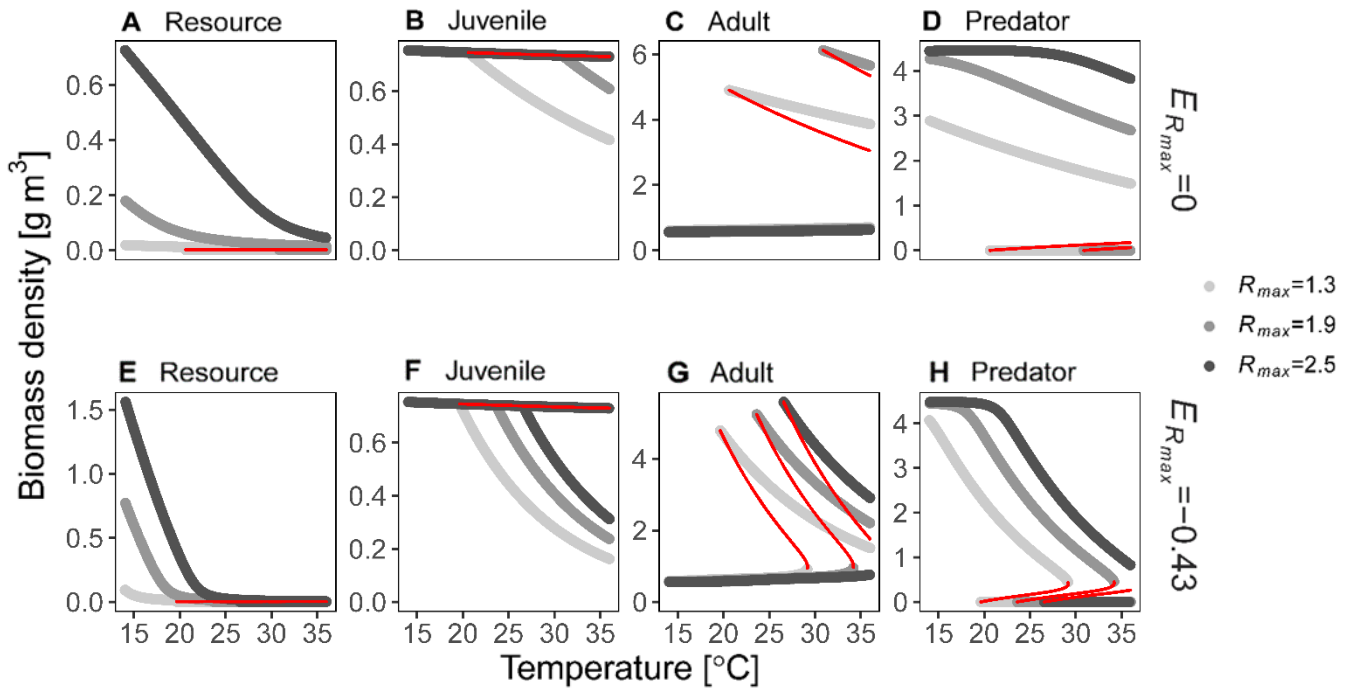

420  
 421  
 422 **Fig. S7.** Equilibrium biomass densities of the resource (A, E), juvenile (B, F) and adult (C, G)  
 423 consumers and predator (D, H) as a function of temperature for three different levels of  $R_{max,T19}$ . The  
 424 chosen  $R_{max,T19}$  levels reflect the range of values used in Fig. 2 (main text) for the predator feeding  
 425 exclusively on juveniles ( $p = 1$ ). The top row shows biomass densities when assuming no effect of  
 426 temperature on  $R_{max,T19}$  and in the bottom row it is assumed that  $R_{max,T19}$  decreases with temperature  
 427 ( $E_{R_{max}} = 0$  and  $-0.43$ , respectively). Thin red lines represent unstable equilibria, drawn to complete  
 428 the two stable branches in the bistable region. All parameters have default values (Table S1). Note that  
 429 predators do not go extinct in the given temperature range when  $R_{max,T19} = 2.5$  and  $E_{R_{max}} = 0$ .

430 4.3 Community composition over temperature and  $R_{max,T19}$  for the non-selective predator  
 431 Fig. S8 illustrates the community composition and type of dynamics as a function of  $R_{max,T19}$  and  
 432 temperature for a predator feeding with equal intensity on both consumer life stages, given different  
 433 temperature-scaling scenarios. This is the  $p = 0.5$ -equivalent of Fig. 2 (main text). For the

434 corresponding biomass densities of the state variables for selected  $R_{max,T19}$ -values, see Fig. S9. The  
 435 temperature at which the cyclic dynamics of the food chain switch to fixed point dynamics increases  
 436 with  $R_{max,T19}$ , as does the temperature at which the predator goes extinct. Note also that with equal  
 437 feeding intensity on both life stages warming does not cause bistability.

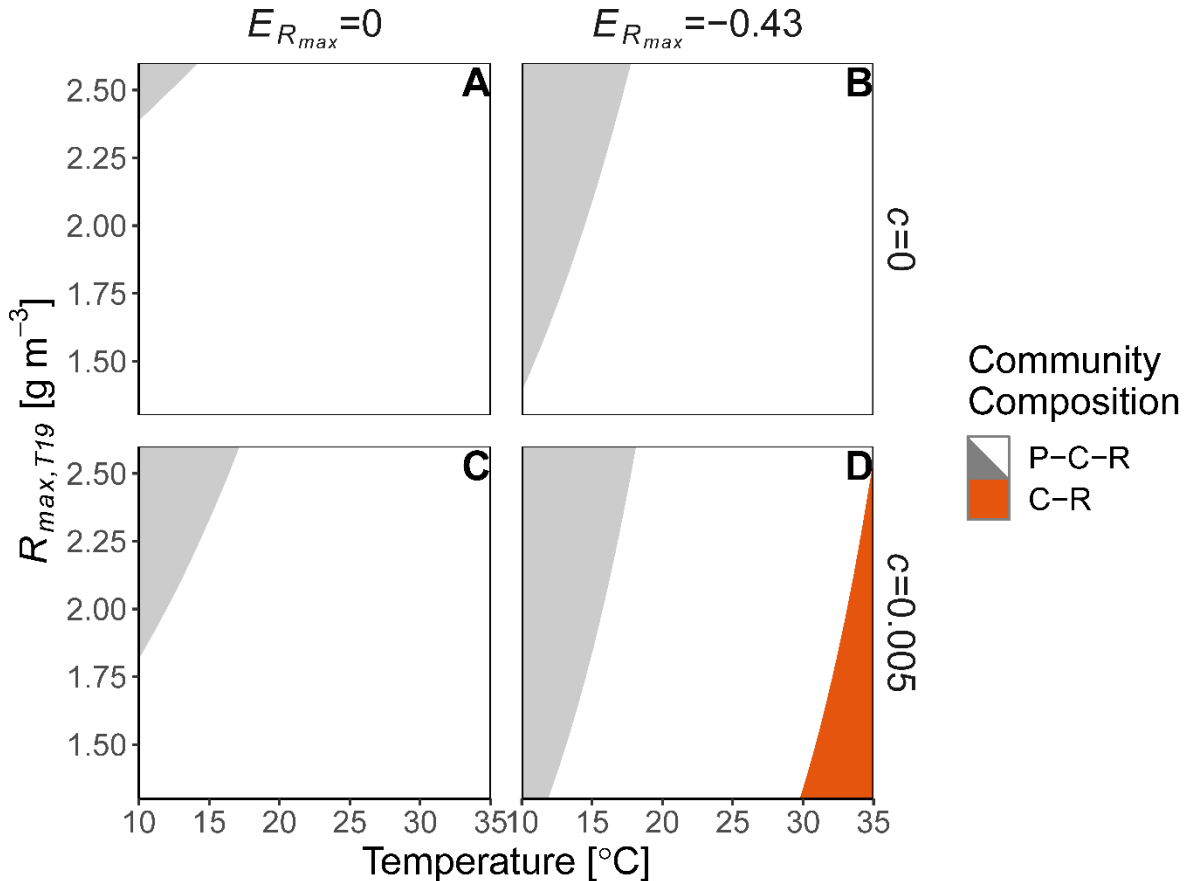

438  
 439 **Fig. S8.** Effects of temperature on community structure depend on temperature scaling of  $R_{max,T19}$  and  
 440 whether metabolism scales with body size and temperature independently ( $c = 0$ ) or interactively ( $c \neq$   
 441  $0$ ) in the consumer ( $C$ ) and predator ( $P$ ). With warming, the tri-trophic food-chain changes from cyclic  
 442 (grey space), to stable dynamics (white space), to being reduced to two trophic levels following predator  
 443 extinction (dark orange space). The figure shows how the species composition and dynamics of the  
 444 food-chain change with temperature and  $R_{max,T19}$ , given no ( $E_{R_{max}} = 0$ ) (A, C) or negative ( $E_{R_{max}} =$   
 445  $-0.43$ ) (B, D) effects of temperature on  $R_{max,T19}$ , with independent (A, B) or interactive (C, D) effects  
 446 of body size and temperature on metabolism. The predator feeds on both consumer life stages ( $p =$   
 447  $0.5$ ), all other parameters have default values.

#### 448 4.4 Equilibrium biomass densities over temperature for different $R_{max,T19}$ ( $p = 0.5$ )

449 Fig. S9 illustrates the change in equilibrium biomass densities over temperature for three selected  
 450  $R_{max,T19}$ -values used in Fig. S8, representing high, medium and low  $R_{max,T19}$ -values. This shows that  
 451 warming causes the predator biomass density to decline (but note no extinction occurs in the

452 temperature range), and that this decline is more rapid when  $R_{max,T19}$  also declines with temperature  
 453 (Fig. S9 E-H versus Fig. S6 A-D).  
 454

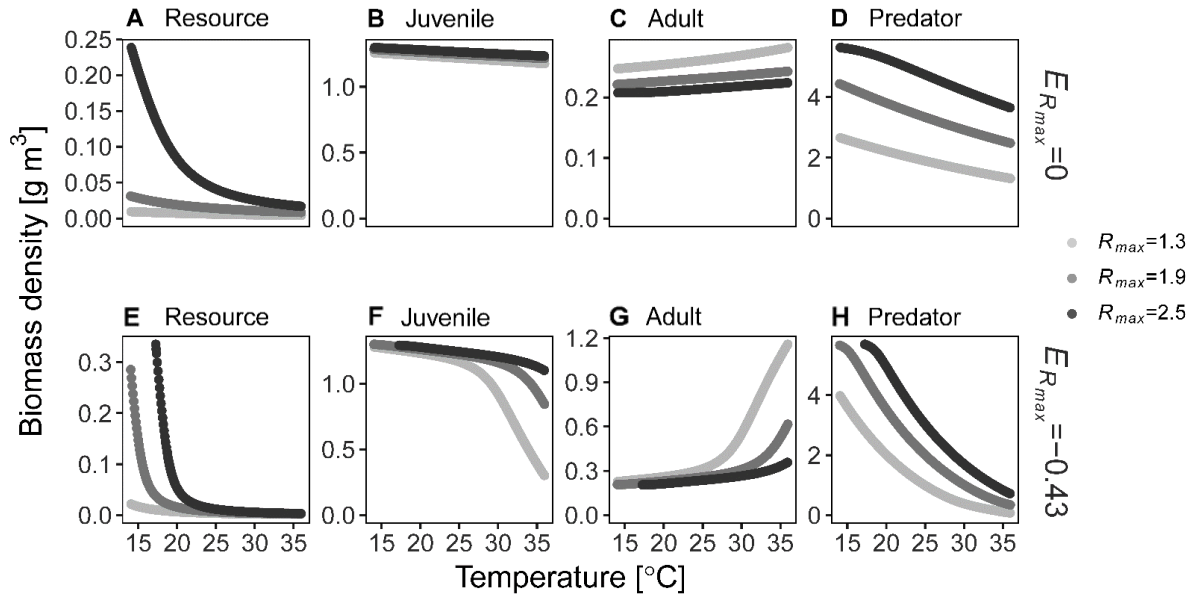

455  
 456 **Fig. S9.** Equilibrium biomass densities of the resource (A, E), juvenile (B, F) and adult (C, G)  
 457 consumers and predator (D, H) as a function of temperature for three different levels of  $R_{max,T19}$ . The  
 458 chosen  $R_{max,T19}$  levels reflect the range of values used in Fig. S8 for the predator feeding with equal  
 459 intensity on both life stages ( $p = 0.5$ ). The top row shows biomass densities when assuming no effect  
 460 of temperature on  $R_{max,T19}$ . In the bottom row it is assumed that  $R_{max,T19}$  decreases with temperature  
 461 ( $E_{R_{max}} = 0$  and  $-0.43$ , respectively). Only stable equilibria are shown. All parameters have default  
 462 values.

#### 463 4.5 Community structure shifts with temperature and the predators' feeding preference

464 Fig. S10 shows the location of bifurcations corresponding to changes in stability and stage structure as  
 465 a function of predators feeding preference ( $p$ ) and temperature, using the empirical model. This analysis  
 466 is the empirical model's analogue to Fig. 3A (main text) and illustrates the close resemblance between  
 467 the two alternative model parameterization in this scenario.

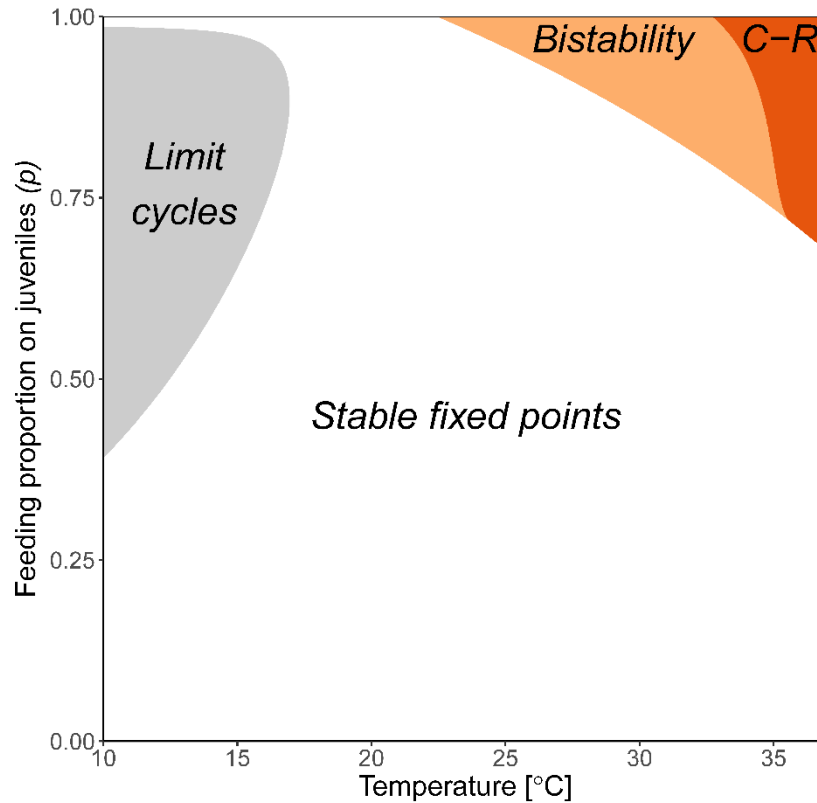

468

469 **Fig. S10** Community structure shifts with temperature and the predators' feeding preference. In grey  
 470 regions all species in the food-chain exhibit stable population cycles, white corresponds to stable  
 471 predator-consumer-resource states, orange shows bistable regions where the food-chain exhibits  
 472 alternative stable states with predators being either extinct or abundant (here the lower temperature  
 473 boundary of the region corresponds to the invasion boundary and the upper is the persistence boundary),  
 474 and dark orange is the stable consumer-resource system where predators cannot persist.  $E_{R_{max}} =$   
 475  $-0.43$ , all other parameters have default values.

476 4.6 Persistence temperature for different predator feeding preferences and variation in  
 477 activation energy

478 The temperature dependence of individual-level rates can be highly variable, especially within species  
 479 (Dell *et al.* 2011a; Englund *et al.* 2011a). In addition, the relative activation energy of vital rates can  
 480 also determine the effect of temperature on population dynamics (Vasseur & McCann 2005; O'Connor  
 481 *et al.* 2011; Fussmann *et al.* 2014; Uszko *et al.* 2017). Therefore, we conducted an additional analysis  
 482 in which the activation energy of functional response parameters ( $a_{J,A,P}$  and  $I_{max,J,A,P}$ ) was scaled by a  
 483 factor of 0.5 and 1.5 relative to metabolic rate ( $E_M = 0.594$ ). This results in  $E_I$ -values between 0.297  
 484 and 0.891, which are in the range of estimates reported in the literature (Dell *et al.* 2011b; Englund *et*  
 485 *al.* 2011b). This analysis corroborates that a juvenile specialized predator has the lowest persistence (in  
 486 terms of temperature at extinction), in the empirical model (Fig. 1, main text), followed by a non-

487 specialized predator and eventually the adult-specialized ( $p = 0$ ), which could persist at the highest  
 488 temperature (Fig. S11). It also shows that the activation energies of metabolic rate and functional  
 489 response parameters only regulate at what temperatures bifurcations occur (i.e. predator extinctions,  
 490 onset of alternative stable states), and not *if* they occur, which instead is determined by feedbacks  
 491 between food-and size-dependent life history processes in combination with predator feeding  
 492 preference. This is in contrast to unstructured models, where the effects of warming on stability and  
 493 persistence largely can be predicted from the temperature dependence of energetic efficiency (Uszko *et*  
 494 *al.* 2017). Similar results were also found in (Lindmark *et al.* 2018). However, when feeding rates are  
 495 more temperature sensitive than metabolism ( $E_I > E_M$ ), extinctions or bistability does not occur in the  
 496 studied temperature range for a predator feeding only on juveniles (Fig. S11-S12).  
 497

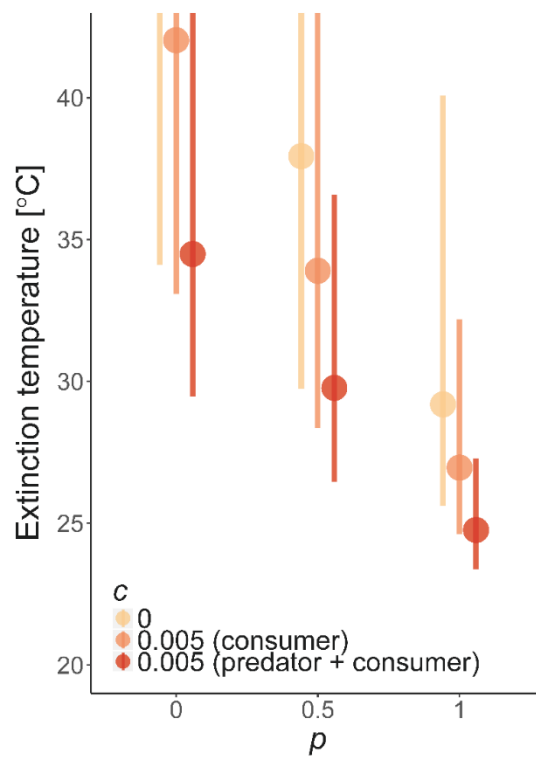

498 **Fig. S11.** Predator starvation temperature as a function of predator feeding preference for different  
 499 interactive effects of size and temperature ( $c$ ). Yellow points are from simulations with no temperature-  
 500 size interaction for metabolism ( $c = 0$ ), orange points are from  $c = 0.005$  for consumers only and red  
 501 points show scenarios in which both consumers and predators have interactive temperature-size scaling  
 502 ( $c = 0.005$ ). Lines correspond to scenarios in which the activation energy of functional response  
 503 parameters were scaled by 0.5 and 1.5 relative to metabolism activation energy, to mimic scenarios  
 504 with different feeding efficiencies (size-independent). Note that bistable dynamics are not highlighted  
 505 in this figure for  $p = 1$ .  $E_{R_{max}} = -0.43$  and  $R_{max,T19} = 1.3 \text{ g m}^{-3}$ , all other parameters have default  
 506 values.  
 507  
 508

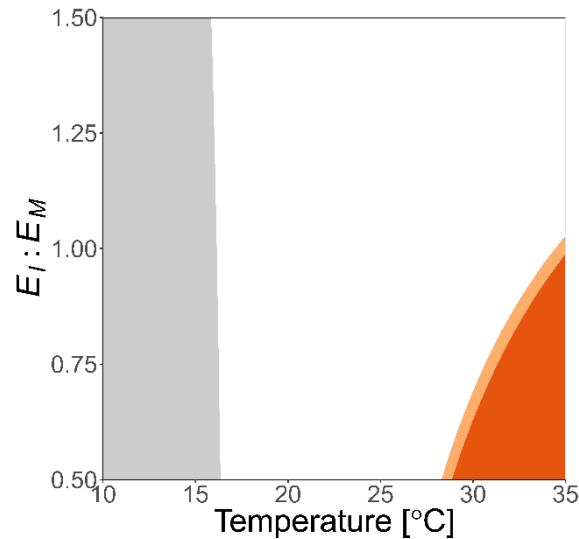

509

510 **Fig. S12.** Community structure shifts with temperature and the activation energy of functional response  
 511 parameters relative to the activation energy of metabolism ( $E_M = 0.594$ ). In grey regions all species in  
 512 the food chain exhibit stable population cycles, white corresponds to stable predator-consumer-resource  
 513 states, orange shows bistable regions where the food chain exhibits alternative stable states with  
 514 predators being either extinct or absent (here the lower temperature boundary of the region corresponds  
 515 to the invasion boundary and the upper is the persistence boundary), and dark orange is the stable  
 516 consumer-resource system where predators cannot persist.  $E_{R_{max}} = -0.43$ , all other parameters have  
 517 default values.

#### 518 4.7 Effects of warming on predator biomass densities under different scenarios of energetic 519 efficiency

520 When the energetic efficiency is temperature-independent in the consumer and predator, such that there  
 521 is no change in the relative increase of gains (ingestion) versus losses (metabolism, mortality) with  
 522 temperature, the activation energy of the basal resource turnover rate ( $E_\delta$ ) does not qualitatively matter  
 523 for the effect of warming on predator biomass if maximum resource density decreases with the same  
 524 rate as turnover rate increases ( $E_{R_{max}} = -E_\delta$ ) (see Table S5, in which  $E_I = E_M = E_\mu = 0.594$  was  
 525 assumed). However, with a temperature-independent  $R_{max,T19}$  ( $E_{R_{max}} = 0$ ), predator biomass density  
 526 increases if resource turnover rate increases faster with temperature than consumer and predator  
 527 feeding, metabolism and mortality, i.e.  $E_\delta > E_{I,M,\mu}$ . When  $R_{max,T19}$  increases with temperature  
 528 ( $E_{R_{max}} = 0.63$ ), predator biomass density always increases with temperature (Table S5).

529 *Table S5. Predator biomass responses to warming for different cases of temperature dependences in the basal resource. When*  
 530 *predator biomass declines, the persistence- and invasion boundaries (limit point and branch point, respectively) are shown.*  
 531  *$E_\delta$ -values are arbitrarily chosen to fulfil the conditions  $E_\delta > E_{I,M,\mu}$ ,  $E_\delta = E_{I,M,\mu}$  and  $E_\delta < E_{I,M,\mu}$ .  $E_{R_{max}}$  is assumed to be -*  
 532  *$E_\delta$ ,  $E_\delta$  or 0, as in the main analyses and  $E_{I,M,\mu} = 0.594$ . While arbitrarily chosen, these values are still in the range of*

533 empirical estimates, see section 2 and (Savage et al. 2004).  $p = 1$ . All other parameters have default values (Table S2). Note,  
 534 these equilibrium continuations all start from a stable equilibrium, as the temperature scalar equal 1 at reference temperature.

| $E_\delta$ | $E_{R_{max}}$ | Predator biomass response to warming (>19 °C)                                                                                                   |
|------------|---------------|-------------------------------------------------------------------------------------------------------------------------------------------------|
| 0.63       | 0             | <i>Increasing</i>                                                                                                                               |
| 0.63       | -0.63         | <i>Decreasing</i> <ul style="list-style-type: none"> <li>• Persistence boundary: 33 °C</li> <li>• Invasion boundary: 23.2 °C</li> </ul>         |
| 0.63       | 0.63          | <i>Increasing</i>                                                                                                                               |
| 0.59       | 0             | <i>No change</i>                                                                                                                                |
| 0.59       | -0.59         | <i>Decreasing</i> <ul style="list-style-type: none"> <li>• Persistence boundary: 33 °C</li> <li>• Invasion boundary: 23.2 °C</li> </ul>         |
| 0.59       | 0.59          | <i>Increasing</i>                                                                                                                               |
| 0.55       | 0             | <i>Decreasing</i> <ul style="list-style-type: none"> <li>• Persistence boundary: &gt; 36 °C</li> <li>• Invasion boundary: &gt; 36 °C</li> </ul> |
| 0.55       | -0.55         | <i>Decreasing</i> <ul style="list-style-type: none"> <li>• Persistence boundary: 33 °C</li> <li>• Invasion boundary: 23.2 °C</li> </ul>         |
| 0.55       | 0.55          | <i>Increasing</i>                                                                                                                               |

535  
 536 Table S5 shows that predator biomass only increases with warming when  $E_\delta > E_{I,M,\mu}$ , given that  
 537  $R_{max,T19}$  is temperature-independent and  $E_I = E_M = E_\mu = 0.594$ , or when  $R_{max}$  increases with  
 538 temperature. In Table S6, we assess the effect of temperature on predator biomass density for the  
 539 scenario  $E_\delta > E_M$ , while also varying the effect of temperature on the energetic efficiency of consumers  
 540 and predators. This shows that predator biomass density can decline with increasing temperatures even  
 541 when  $E_\delta > E_{I,M,\mu}$  and  $R_{max,T19}$  is temperature-independent, given that predator and consumer energetic  
 542 efficiency declines with temperature. As in Table S5, predator biomass density increases when  $R_{max}$   
 543 increases with temperature. If also the energetic efficiency declines with temperature, warming  
 544 eventually induces limit cycles (Hopf bifurcation at 28.4 °C).

545 *Table S6. Predator biomass responses to warming for different cases of temperature dependences in the basal resource using*  
 546 *the empirical model. When predator biomass declines, the persistence- and invasion boundaries (limit point and branch point,*  
 547 *respectively) are shown. The temperature dependence of feeding rates are varied relative to the activation energy of*  
 548 *metabolism and mortality, the two loss terms for biomass ( $E_M = E_\mu = 0.594$ ) to capture different effects of temperature on*



549 the energetic efficiency of consumers and predators, given  $E_\delta = 0.63$ ,  $E_{R_{max}} = 0, -0.63$  or  $0.63$  and  $p = 1$ . All other  
 550 parameters have default values (Table S2).

| $E_I: E_{M,\mu}$ | $E_\delta$ | $E_{R_{max}}$ | Predator biomass response to warming (>19 °C)                                                                                                |
|------------------|------------|---------------|----------------------------------------------------------------------------------------------------------------------------------------------|
| 1.5              | 0.63       | 0             | <i>Increasing</i>                                                                                                                            |
| 1.5              | 0.63       | -0.63         | <i>Decreasing</i> <ul style="list-style-type: none"> <li>• Persistence boundary: &gt; 36 °C</li> <li>• Invasion boundary: 26.9 °C</li> </ul> |
| 1.5              | 0.63       | 0.63          | <i>Increasing</i>                                                                                                                            |
| 1                | 0.63       | 0             | <i>Increasing</i>                                                                                                                            |
| 1                | 0.63       | -0.63         | <i>Decreasing</i> <ul style="list-style-type: none"> <li>• Persistence boundary: 33 °C</li> <li>• Invasion boundary: 23.2 °C</li> </ul>      |
| 1                | 0.63       | 0.63          | <i>Increasing</i>                                                                                                                            |
| 0.5              | 0.63       | 0             | <i>Decreasing</i> <ul style="list-style-type: none"> <li>• Persistence boundary: &gt; 36 °C</li> <li>• Invasion boundary: 29.6 °C</li> </ul> |
| 0.5              | 0.63       | -0.63         | <i>Decreasing</i> <ul style="list-style-type: none"> <li>• Persistence boundary: 27.9 °C</li> <li>• Invasion boundary: 21.8 °C</li> </ul>    |
| 0.5              | 0.63       | 0.63          | <i>Increasing until onset of limit cycles (Hopf bifurcation at 28.4 °C)</i>                                                                  |

551 4.8 Mean body size of the community under warming

552 We also calculated biomass-weighted mean body size ( $S_T$ ) of the community for stable equilibria at  
 553 temperature  $T$  (averaged for each  $T$ ) as  $S_T = \frac{\sum_s (S_s \cdot B_{s,T})}{\sum_s B_{s,T}}$ , where  $S_s$  is the representative body size of  
 554 juvenile consumers, adult consumers or predators ( $s = J, A, P$ ) and  $B_{s,T}$  is their corresponding  
 555 equilibrium biomass density at temperature  $T$ . The general decline in predator biomass with increased  
 556 temperatures leads to a decline in the biomass-weighted mean community body size (Fig. S13). As with  
 557 the abrupt predator collapse, the community size structure can also show a non-gradual abrupt decline  
 558 as temperature increases, leading to alternative stable “community size states”.

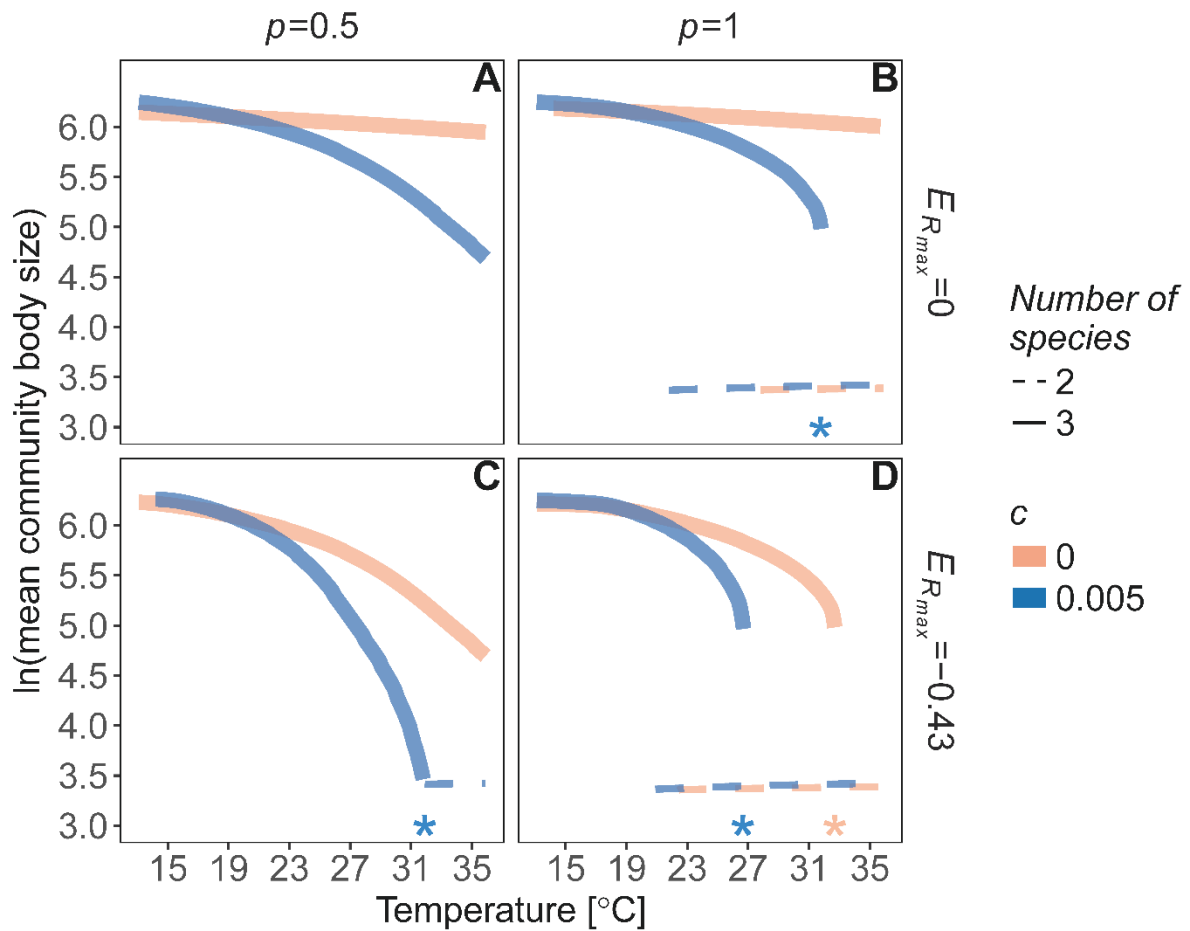

559

560 **Fig. S13** Mean body size ( $S_T$ ) in the community decreases with temperature, and warming can induce  
 561 abrupt shifts in mean community body size. The warming effects on  $S_T$  depend on maximum resource  
 562 density ( $R_{max,T19}$ ), ecological interactions and temperature-size interactions, as shown for food-chains  
 563 with a predator species feeding with equal intensity on both consumer life stages (A, C) ( $p = 0.5$ ) or  
 564 exclusively on juveniles (B, D) ( $p = 1$ ), in a system with no temperature effects (A, B) on  $R_{max,T19}$   
 565 ( $E_{R_{max}} = 0$ ) or declining  $R_{max,T19}$  with temperature (C, D) ( $E_{R_{max}} = -0.43$ ). Colors indicate different  
 566 temperature-size scaling of metabolism, where coral lines show independent effects of body size and  
 567 temperature,  $c = 0$  and blue lines show positive interactive effects,  $c = 0.005$ . Dashed curves  
 568 correspond to equilibria in which the predator has gone extinct, and mean community body size  
 569 correspondingly has shifted to smaller values. Stars indicate the maximum temperature for predator  
 570 persistence. Parameters have default values.

## 571 5. Generic stage-structured biomass model

572 In order to explore the robustness and generality of our results, we also analysed selected temperature-  
 573 scaling scenarios in a simpler model with respect to model functions and assumptions. This model (Box  
 574 4.1 and 4.2 in (De Roos & Persson 2013)) is a tri-trophic and temperature-dependent version of the

575 original (generic) stage-structured biomass model (De Roos *et al.* 2007, 2008), to which we add  
 576 temperature dependence in the same way as the empirical model (see main text). All dynamical  
 577 equations are the same as presented in Eqns. 1-4 in the main text. The model is described in Table S7-  
 578 S8 (note some variable names may be overlapping with the empirical model because we wanted to keep  
 579 the same variable names as in the original formulation) (De Roos & Persson 2013).

580 The main motivation for using the generic model for comparison lies in its simplicity. Specifically,  
 581 in the generic model (De Roos *et al.* 2008), it is assumed that individual-level and mass-specific rates  
 582 (intake, maintenance, mortality) scale linearly with body size. Life stage specific competitive ability  
 583 (leading to ontogenetic asymmetry if not identical) is implemented by scaling the resource intake by  
 584 adults in relation to resource intake by juveniles with a single parameter  $q$  (Table S7). This asymmetry  
 585 in turn determines which life stage exhibits biomass overcompensation in response to mortality, and  
 586 thus whether emergent Allee effects and bistability occurs with warming. This is a more  
 587 phenomenological implementation of ontogenetic asymmetry compared to our empirical model, where  
 588 asymmetry emerges because vital rates scale sub-linearly with body size and consumer life stages are  
 589 characterized by different body sizes. For example, in the empirical model, feeding rates and  
 590 metabolism stem from single species experiments or data and thus are more realistic. The parameters  
 591 in the generic model stem from averages from inter-specific relationships (e.g. ectotherm invertebrates)  
 592 (De Roos & Persson 2013). However, while the generic parameterization is more phenomenological, it  
 593 can be used to generalize the results of the empirical model and show how they emerge because of the  
 594 specific type of asymmetry in the empirical model (i.e. juveniles being competitively superior to adults).  
 595 Another important difference is that the generic parameterization uses a Monod-equation (Monod 1949)  
 596 with a size independent (constant) half saturation resource density, as opposed to the Holling Type II  
 597 functional response with a size-dependent attack rate in our default, empirical parameterization.

598 We implement temperature dependence in the generic model in the same way as in the empirical  
 599 model, i.e. by scaling the parameters resource turnover ( $\rho$ ), maximum resource density ( $R_{max}$ ),  
 600 maximum intake rate ( $M_{C,P}$ ), background mortality ( $\mu_{C,P}$ ) and maintenance ( $T_{C,P}$ ) with the Boltzmann-  
 601 Arrhenius function  $e^{\frac{E_Y(T-T_0)}{kTT_0}}$ , where  $E_Y$  refers to the activation energy of the corresponding rate (same  
 602 as in the empirical model, see Table S2 for values).

603 *Table S7 Model equations and functions of the original (generic) stage-structured biomass model*

| Dynamic equations                                                      | Description                   |
|------------------------------------------------------------------------|-------------------------------|
| $\frac{dR}{dt} = G(R) - \omega_J(R)J - \omega_A(R)A$                   | Resource biomass dynamics     |
| $\frac{dJ}{dt} = v_A^+(R)A - \gamma(v_J^+, d_J)J + v_J(R)J - d_J(P)J$  | Biomass dynamics of juveniles |
| $\frac{dA}{dt} = \gamma(v_J^+, d_J)J + (v_A(R) - v_A^+(R))A - d_A(P)A$ | Biomass dynamics of adults    |

|                                        |                                                                              |                                    |
|----------------------------------------|------------------------------------------------------------------------------|------------------------------------|
| $\frac{dP}{dt} = (v_P(J, A) - \mu_P)P$ |                                                                              | Biomass dynamics of predators      |
| <b>Function</b>                        | <b>Expression</b>                                                            | <b>Description</b>                 |
| $G(R, T)$                              | $\rho(R_{max} - R)$                                                          | Intrinsic resource turnover        |
| $\omega_J(R)$                          | $M_c R / (H_c + R)$                                                          | Resource intake by juveniles       |
| $\omega_A(R)$                          | $q M_c R / (H_c + R)$                                                        | Resource intake by adults          |
| $v_J(R)$                               | $\sigma_c \omega_J(R) - T_c$                                                 | Net energy production of juveniles |
| $v_A(R)$                               | $\sigma_c \omega_A(R) - T_c$                                                 | Net energy production of adults    |
| $d_J(P)$                               | $\mu_J + \frac{M_P \phi P}{H_p + \phi J + (1 - \phi)A}$                      | Mortality rate of juveniles        |
| $d_A(P)$                               | $\mu_A + \frac{M_P (1 - \phi) P}{H_p + \phi J + (1 - \phi)A}$                | Mortality rate of adults           |
| $\gamma(v_J^+, d_J)$                   | $(v_J^+(R) - d_J(P)) / (1 - z^{(1 - \frac{d_J(P)}{v_J^+(R)})})$              | Maturation rate of juveniles       |
| $v_P(J, A)$                            | $\sigma_P M_P \frac{\phi J + (1 - \phi)A}{H_p + \phi J + (1 - \phi)A} - T_P$ | Net energy production of predators |

604

605 *Table S8 Parameters in the original (generic) stage-structured biomass model. See Box. 3.4 in De Roos & Persson (2013).*

| Parameter       | Value                                           | Unit              | Description                                |
|-----------------|-------------------------------------------------|-------------------|--------------------------------------------|
| <b>Resource</b> |                                                 |                   |                                            |
| $\rho$          | 0.1                                             | day <sup>-1</sup> | Resource turnover rate                     |
| $R_{max}$       | 18                                              | mg/L              | Resource maximum biomass density           |
| <b>Prey</b>     |                                                 |                   |                                            |
| $W_A$           | 0.0001                                          | g                 |                                            |
| $M_c$           | $0.1 W_A^{-0.25}$                               | day <sup>-1</sup> | Mass-specific maximum ingestion rate       |
| $H_c$           | 3                                               | mg/L              | Ingestion half-saturation resource density |
| $q$             | 0.5 or 2                                        | -                 | Adult-juvenile consumer ingestion ratio    |
| $T_c$           | $0.01 W_A^{-0.25}$                              | day <sup>-1</sup> | Mass-specific maintenance rate             |
| $\sigma_c$      | 0.5                                             | -                 | Conversion efficiency                      |
| $z$             | 0.01 when<br>$q = 0.5$ ; 0.5<br>when<br>$q = 2$ | -                 | New born-adult consumer size ratio         |
| $\mu_J$         | $0.0015 W_A^{-0.25}$                            | day <sup>-1</sup> | Juvenile background mortality rate         |

|                 |                     |                   |                                            |
|-----------------|---------------------|-------------------|--------------------------------------------|
| $\mu_A$         | $0.0015W_A^{-0.25}$ | day <sup>-1</sup> | Adult background mortality rate            |
| <b>Predator</b> |                     |                   |                                            |
| $W_P$           | 0.01                | g                 |                                            |
| $M_P$           | $0.1W_P^{-0.25}$    | day <sup>-1</sup> | Mass-specific maximum ingestion rate       |
| $H_P$           | 3                   | mg/L              | Ingestion half-saturation resource density |
| $T_P$           | $0.01W_P^{-0.25}$   | day <sup>-1</sup> | Mass-specific maintenance rate             |
| $\sigma_P$      | 0.5                 | -                 | Conversion efficiency                      |
| $\mu_P$         | $0.0015W_P^{-0.25}$ | day <sup>-1</sup> | Predator background mortality rate         |
| $\phi$          | 0.0-1.0             | -                 | Predator foraging preference for juveniles |

## 606 6. Assessing the sensitivity to model functions using a generic model

607 In addition to evaluating parameter sensitivity of model results we also assessed the sensitivity of the  
608 model with respect to model functions, using the generic model parameterization (De Roos *et al.* 2007;  
609 De Roos & Persson 2013). This also allowed us to test the correspondence between the empirical model  
610 with its more complex empirically derived parameterization and the simpler, more phenomenological  
611 generic parameterization, and to generalize the results by showing that the type of regulation in the  
612 consumer population determines the effect of stage-specific predation on stability and persistence (see  
613 Fig. 3, main text). Fig. S14 shows the equilibrium biomass densities over temperature using the generic  
614 model parameterization coupled with the default temperature scaling. Qualitatively the results are very  
615 similar to those shown in Fig. 1 (main text), which are based on the analogues analysis using the  
616 empirical model.  
617

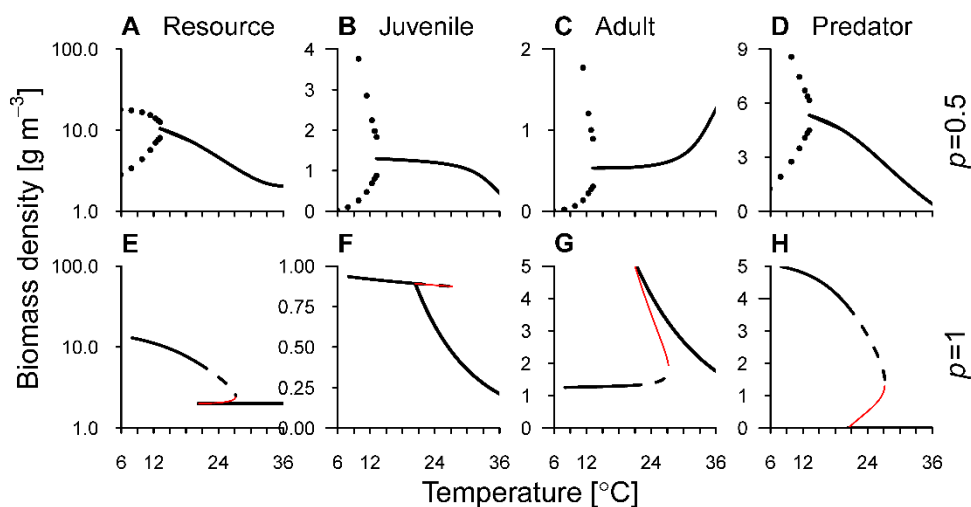

618

619 **Fig. S14.** Effects of warming on food chain stability depend on ecological interactions – generic model  
620 parameterization (De Roos *et al.*, 2007) with added temperature-dependence. Equilibrium biomass

621 densities of the resource (A, E), consumer life stages (B-C, F-G) and predator (D, H) as a function of  
622 temperature, given a predator feeding with equal intensity on both life stages (A-D) ( $\phi = 0.5$ ) or  
623 exclusively on juveniles (E-H) ( $\phi = 1$ ). Black lines (solid and dashed) are stable equilibria and red thin  
624 lines are unstable equilibria (connecting the two stable branches in the bistable region), which separate  
625 the two stable equilibria when there are alternative stable states. Maximum and minimum biomass  
626 density of a stable limit cycle is shown with points (top row below  $\sim 13$  °C). Alternative stable states,  
627 where predators are either extinct or abundant, occur between  $\sim 21$ - $30$  °C in E-H. Note the different  
628 scales on the y-axes and the logarithmic y-axis for resources densities.  $E_{R_{max}} = -0.43$ ,  $q = 0.5$ , all  
629 other parameters have default values (SI Appendix S2, Table S8).

## 630 Cited literature

- 631 Armstrong, J.D. & Hawkins, L.A. (2008). Standard metabolic rate of pike, *Esox lucius*: variation  
632 among studies and implications for energy flow modelling. *Hydrobiologia*, 601, 83–90.
- 633 Armstrong, J.D., Priede, I.G. & Lucas, M.C. (1992). The link between respiratory capacity and  
634 changing metabolic demands during growth of northern pike, *Esox lucius* L. *Journal of Fish*  
635 *Biology*, 41, 65–75.
- 636 Byström, P. & Andersson, J. (2005). Size-dependent foraging capacities and intercohort competition  
637 in an ontogenetic omnivore (Arctic char). *Oikos*, 110, 523–536.
- 638 Byström, P. & García-Berthou. (1999). Density dependent growth and size specific competitive  
639 interactions in young fish. *Oikos*, 86, 217–232.
- 640 Claessen, D., De Roos, A.M. & Persson, L. (2000). Dwarfs and Giants: Cannibalism and Competition  
641 in Size-Structured Populations. *The American Naturalist*, 155, 219–237.
- 642 De Roos, A.M. & Persson, L. (2001). Physiologically structured models - from versatile technique to  
643 ecological theory. *Oikos*, 94, 51–71.
- 644 De Roos, A.M. & Persson, L. (2013). *Population and community ecology of ontogenetic development*.  
645 Princeton University Press.
- 646 De Roos, A.M., Schellekens, T., van Kooten, T., van De Wolfshaar, K.E., Claessen, D. & Persson, L.  
647 (2008). Simplifying a physiologically structured population model to a stage-structured  
648 biomass model. *Theoretical Population Biology*, 73, 47–62.
- 649 De Roos, A.M., Schellekens, T., van Kooten, T., van de Wolfshaar, K.E., Claessen, D. & Persson, L.  
650 (2007). Food-dependent growth leads to overcompensation in stage-specific biomass when  
651 mortality increases: the influence of maturation versus reproduction regulation. *The American*  
652 *Naturalist*, 170, E59–E76.
- 653 Dell, A.I., Pawar, S. & Savage, V.M. (2011a). Systematic variation in the temperature dependence of  
654 physiological and ecological traits. *Proceedings of the National Academy of Sciences, USA*,  
655 108, 10591–10596.

- 656 Dell, A.I., Pawar, S. & Savage, V.M. (2011b). Systematic variation in the temperature dependence of  
657 physiological and ecological traits. *Proceedings of the National Academy of Sciences, USA*,  
658 108, 10591–10596.
- 659 van Denderen, P.D. & van Kooten, T. (2013). Size-based species interactions shape herring and cod  
660 population dynamics in the face of exploitation. *Ecosphere*, 4, 1–15.
- 661 Diana, J.S. (1982). An experimental analysis of the metabolic rate and food utilization of northern  
662 pike. *Comparative Biochemistry and Physiology – Part A: Physiology*, 71, 395–399.
- 663 Downs, C.J., Hayes, J.P. & Tracy, C.R. (2008). Scaling metabolic rate with body mass and inverse  
664 body temperature: A test of the Arrhenius fractal supply model. *Functional Ecology*, 22, 239–  
665 244.
- 666 Englund, G., Öhlund, G., Hein, C.L. & Diehl, S. (2011a). Temperature dependence of the functional  
667 response. *Ecology Letters*, 14, 914–921.
- 668 Englund, G., Öhlund, G., Hein, C.L. & Diehl, S. (2011b). Temperature dependence of the functional  
669 response. *Ecology Letters*, 14, 914–921.
- 670 Froese, R., Thorson, J.T. & Reyes, R.B. (2014). A Bayesian approach for estimating length-weight  
671 relationships in fishes. *Journal of Applied Ichthyology*, 30, 78–85.
- 672 Fussmann, K.E., Schwarzmüller, F., Brose, U., Jousset, A. & Rall, B.C. (2014). Ecological stability in  
673 response to warming. *Nature Climate Change*, 4, 206–210.
- 674 Gilbert, B., Tunney, T.D., McCann, K.S., DeLong, J.P., Vasseur, D.A., Savage, V.M., *et al.* (2014). A  
675 bioenergetic framework for the temperature dependence of trophic interactions. *Ecology*  
676 *Letters*, 17, 902–914.
- 677 Gillooly, J.F., Brown, J.H., West, G.B., Savage, V.M. & Charnov, E.L. (2001). Effects of size and  
678 temperature on metabolic rate. *Science*, 2248–2251.
- 679 Groot, C. (2010). *Physiological Ecology of Pacific Salmon*. UBC Press.
- 680 Heikinheimo, O. & Korhonen, A.P. (1996). Food consumption of northern pike (*Esox lucius* L.),  
681 estimated with a bioenergetics model. *Ecology of Freshwater Fish*, 5, 37–47.
- 682 Hjelm, J. & Persson, L. (2001). Size-dependent attack rate and handling capacity: inter-cohort  
683 competition in a zooplanktivorous fish. *Oikos*, 95, 520–532.
- 684 Hölker, F. (2000). Bioenergetik dominanter Fischarten (*Abramis brama* (Linnaeus, 1758) und *Rutilus*  
685 *rutilus* (Linnaeus, 1758)) in einem eutrophen See Schleswig-Holsteins: Ökophysiologie und  
686 individuen-basierte Modellierung. PhD Thesis. Verein zur Förderung der  
687 Ökosystemforschung zu Kiel.
- 688 Hölker, F. & Haertel, S.S. (2004). Application of a bioenergetics model to roach. *Journal of Applied*  
689 *Ichthyology*, 20.
- 690 Holling, C.S. (1959). Some characteristics of simple types of predation and parasitism. *Canadian*  
691 *Entomologist*, 91, 385–398.

- 692 Karås, P. & Thoresson, G. (1992). An application of a bioenergetics model to Eurasian perch (*Perca*  
693 *fluviatilis* L.). *Journal of Fish Biology*, 41, 217–230.
- 694 van Leeuwen, A., De Roos, A.M. & Persson, L. (2008). How cod shapes its world. *Journal of Sea*  
695 *Research*, 60, 89–104.
- 696 Lindmark, M., Huss, M., Ohlberger, J. & Gårdmark, A. (2018). Temperature-dependent body size  
697 effects determine population responses to climate warming. *Ecology Letters*, 21, 181–189.
- 698 Lumb, C.E., Johnson, T.B., Cook, H.A. & Hoyle, J.A. (2007). Comparison of lake whitefish  
699 (*Coregonus clupeaformis*) growth, condition, and energy density between Lakes Erie and  
700 Ontario. *Journal of Great Lakes Research*, 33, 314–325.
- 701 Mitchell, S.E., Halves, J. & Lampert, W. (2004). Coexistence of similar genotypes of *Daphnia magna*  
702 in intermittent populations: response to thermal stress. *Oikos*, 106, 469–478.
- 703 Monod, J. (1949). The growth of bacterial cultures. *Annu. Rev. Microbiol.*, 3, 371–394.
- 704 O'Connor, M.I., Gilbert, B. & Brown, C.J. (2011). Theoretical predictions for how temperature  
705 affects the dynamics of interacting herbivores and plants. *The American Naturalist*, 178, 626–  
706 638.
- 707 Ohlberger, J., Edeline, E., Vollestad, L.A., Stenseth, N.C. & Claessen, D. (2011). Temperature-driven  
708 regime shifts in the dynamics of size-structured populations. *The American Naturalist*, 177,  
709 211–223.
- 710 Ohlberger, J., Mehner, T., Staaks, G. & Hölker, F. (2012). Intraspecific temperature dependence of  
711 the scaling of metabolic rate with body mass in fishes and its ecological implications. *Oikos*,  
712 121, 245–251.
- 713 Persson, L., Amundsen, P.-A., M., D.R.A., Klemetsen, A., Knudsen, R. & Primicerio, R. (2007).  
714 Culling prey promotes predator recovery - alternative states in a whole-lake experiment.  
715 *Science*, 316, 1743–1746.
- 716 Persson, L., Bertolo, A. & De Roos, A.M. (2006). Temporal stability in size distributions and growth  
717 rates of three *Esox lucius* L. populations. A result of cannibalism? *Journal of Fish Biology*,  
718 69, 461–472.
- 719 Persson, L. & De Roos, A.M. (2013). Symmetry breaking in ecological systems through different  
720 energy efficiencies of juveniles and adults. *Ecology*, 94, 1487–1498.
- 721 Persson, L., Leonardsson, K., De Roos, A.M., Gyllenberg, M. & Christensen, B. (1998). Ontogenetic  
722 scaling of foraging rates and the dynamics of a size-structured consumer-resource model.  
723 *Theoretical Population Biology*, 54, 270–293.
- 724 Peters, R.H. (1983). *The ecological implications of body size*. Cambridge University Press.
- 725 Pothoven, S.A., Nalepa, T.F., Madenjian, C.P., Rediske, R.R., Schneeberger, P.J. & He, J.X. (2006).  
726 Energy density of lake whitefish *Coregonus clupeaformis* in Lakes Huron and Michigan.  
727 *Environmental Biology of Fishes*, 76, 151–158.



- 728 R Core Team. (2018). *R: A Language and Environment for Statistical Computing*. R Foundation for  
729 *Statistical Computing*. Vienna, Austria.
- 730 Savage, V.M., Gillooly, J.F., Brown, J.H., West, G.B. & Charnov, E.L. (2004). Effects of body size  
731 and temperature on population growth. *The American Naturalist*, 163, 429–441.
- 732 Stoessel, D.J. (2014). Age, growth, condition and reproduction of roach *Rutilus rutilus* (Teleostei:  
733 *Cyprinidae*), in south-eastern Australia. *Marine & Freshwater Research*, 65, 275–281.
- 734 Uszko, W., Diehl, S., Englund, G. & Amarasekare, P. (2017). Effects of warming on predator-prey  
735 interactions: a resource-based approach and a theoretical synthesis. *Ecology Letters*, 20, 513–  
736 523.
- 737 Vasseur, D.A. & McCann, K.S. (2005). A mechanistic approach for modelling temperature-dependent  
738 consumer-resource dynamics. *The American Naturalist*, 166, 184–198.
- 739 van de Wolfshaar, K.E., De Roos, A.M. & Persson, L. (2006). Size-Dependent Interactions Inhibit  
740 Coexistence in Intraguild Predation Systems with Life-History Omnivory. *American*  
741 *Naturalist*, 168, 62–75.
- 742 van de Wolfshaar, K.E., Schellekens, T., Poos, J.J. & van Kooten, T. (2012). Interspecific Resource  
743 Competition Effects on Fisheries Revenue. *PLoS ONE*, 7.
- 744
